# Supplementary material for: Tetrazole and acylsulfonamide bioisosteric replacements of the carboxylic acid in a dual MCL-1/BCL-x L inhibitor are tolerated
Source: Royal Society of Chemistry journal article supplement (doi:10.1039/d3ra05711a), 2023-01-01

## Compound 2

Sample Name:

Data Collected on:

400mr-vnmrs400

Archive directory:

Sample directory:

FidFile: PROTON

Pulse Sequence: PROTON (s2pul)

Solvent: cdcl3

Data collected on: Jan 27 2015

Temp. 25.0 C / 298.1 K

Operator: work

Relax. delay 2.000 sec

Pulse 79.4 degrees

Acq. time 1.278 sec

Width 6410.3 Hz

4 repetitions

OBSERVE H1, 399.7512853 MHz

DATA PROCESSING

Line broadening 0.5 Hz

FT size 16384

Total time 0 min 13 sec

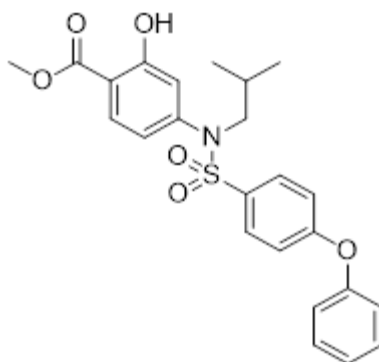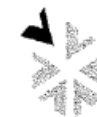

VARIAN

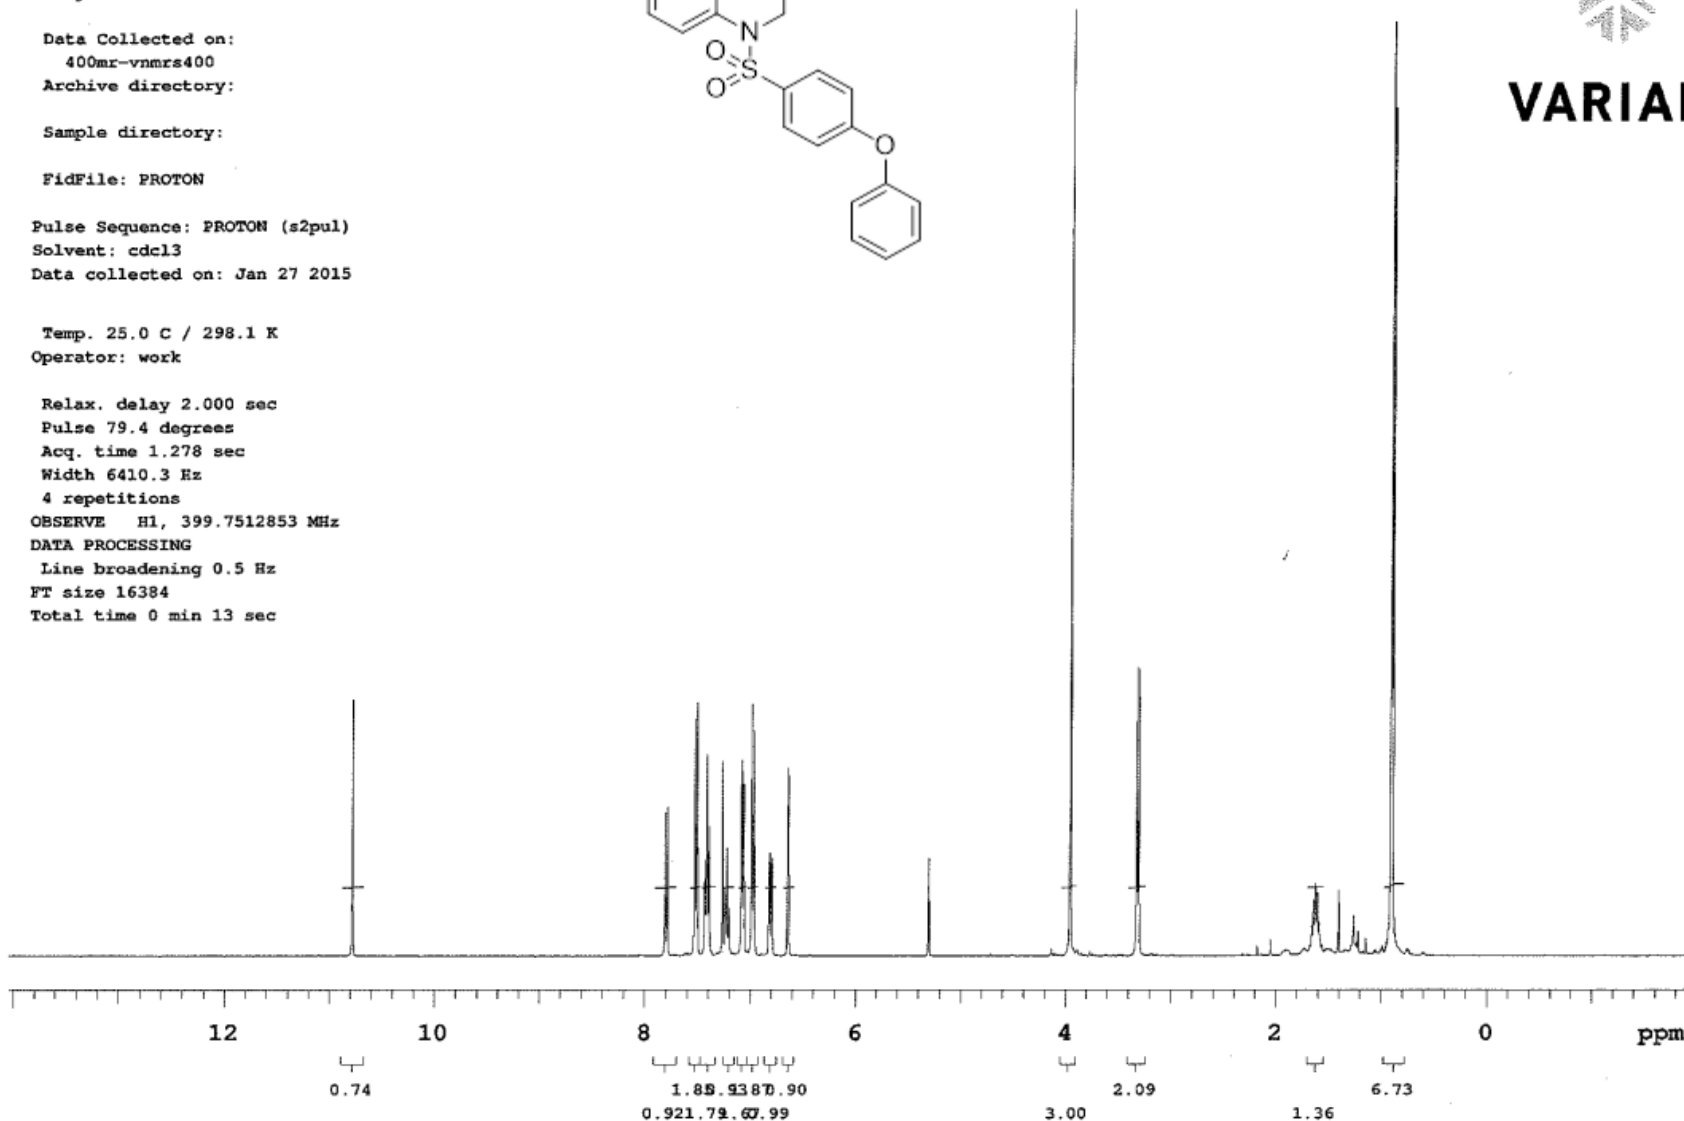

# Compound 2

Sample Name:

Data Collected on:

400mr-vnmrs400

Archive directory:

Sample directory:

FidFile: CARBON

Pulse Sequence: CARBON (s2pul)

Solvent: cdcl3

Data collected on: Jan 27 2015

Temp. 25.0 C / 298.1 K

Operator: work

Relax. delay 1.000 sec

Pulse 58.1 degrees

Acq. time 0.813 sec

Width 24509.8 Hz

280 repetitions

OBSERVE C13, 100.5175428 MHz

DECOUPLE H1, 399.7532925 MHz

Power 39 dB

continuously on

WALTZ-16 modulated

DATA PROCESSING

Line broadening 3.0 Hz

FT size 32768

Total time 30 min

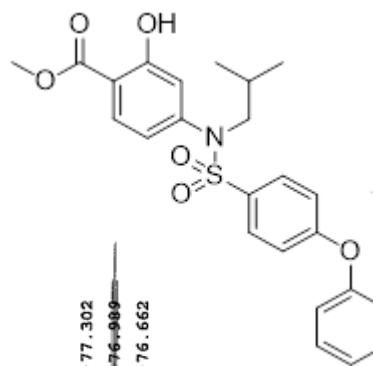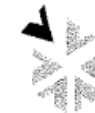

# VARIAN

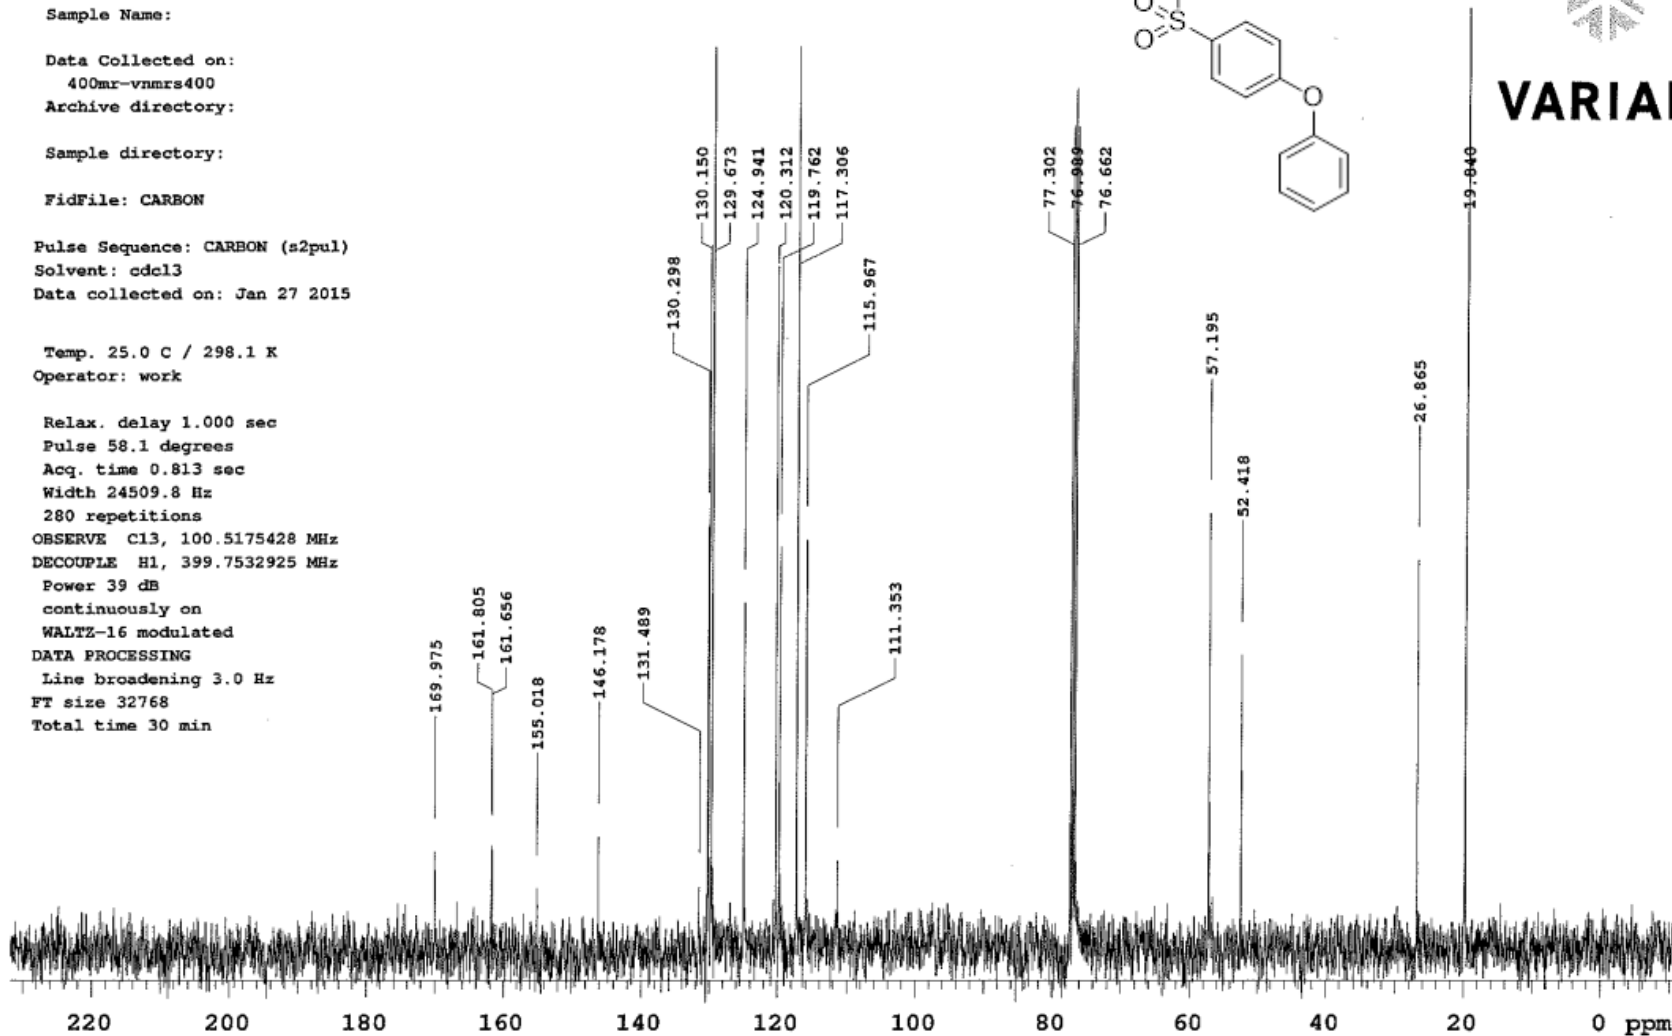

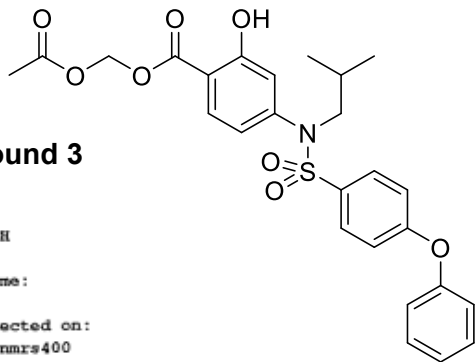

### Compound 3

LC-4-141-1H

Sample Name:

Data Collected on:

400mr-vnmrs400

Archive directory:

Sample directory:

FidFile: PROTON

Pulse Sequence: PROTON (s2pul)

Solvent: dmso

Data collected on: Feb 21 2023

Temp. 25.0 C / 298.1 K

Operator: work

Relax. delay 5.000 sec

Pulse 92.6 degrees

Acq. time 1.278 sec

Width 6410.3 Hz

8 repetitions

OBSERVE H1, 399.7525412 MHz

DATA PROCESSING

Line broadening 0.5 Hz

FT size 16384

Total time 3 min 21 sec

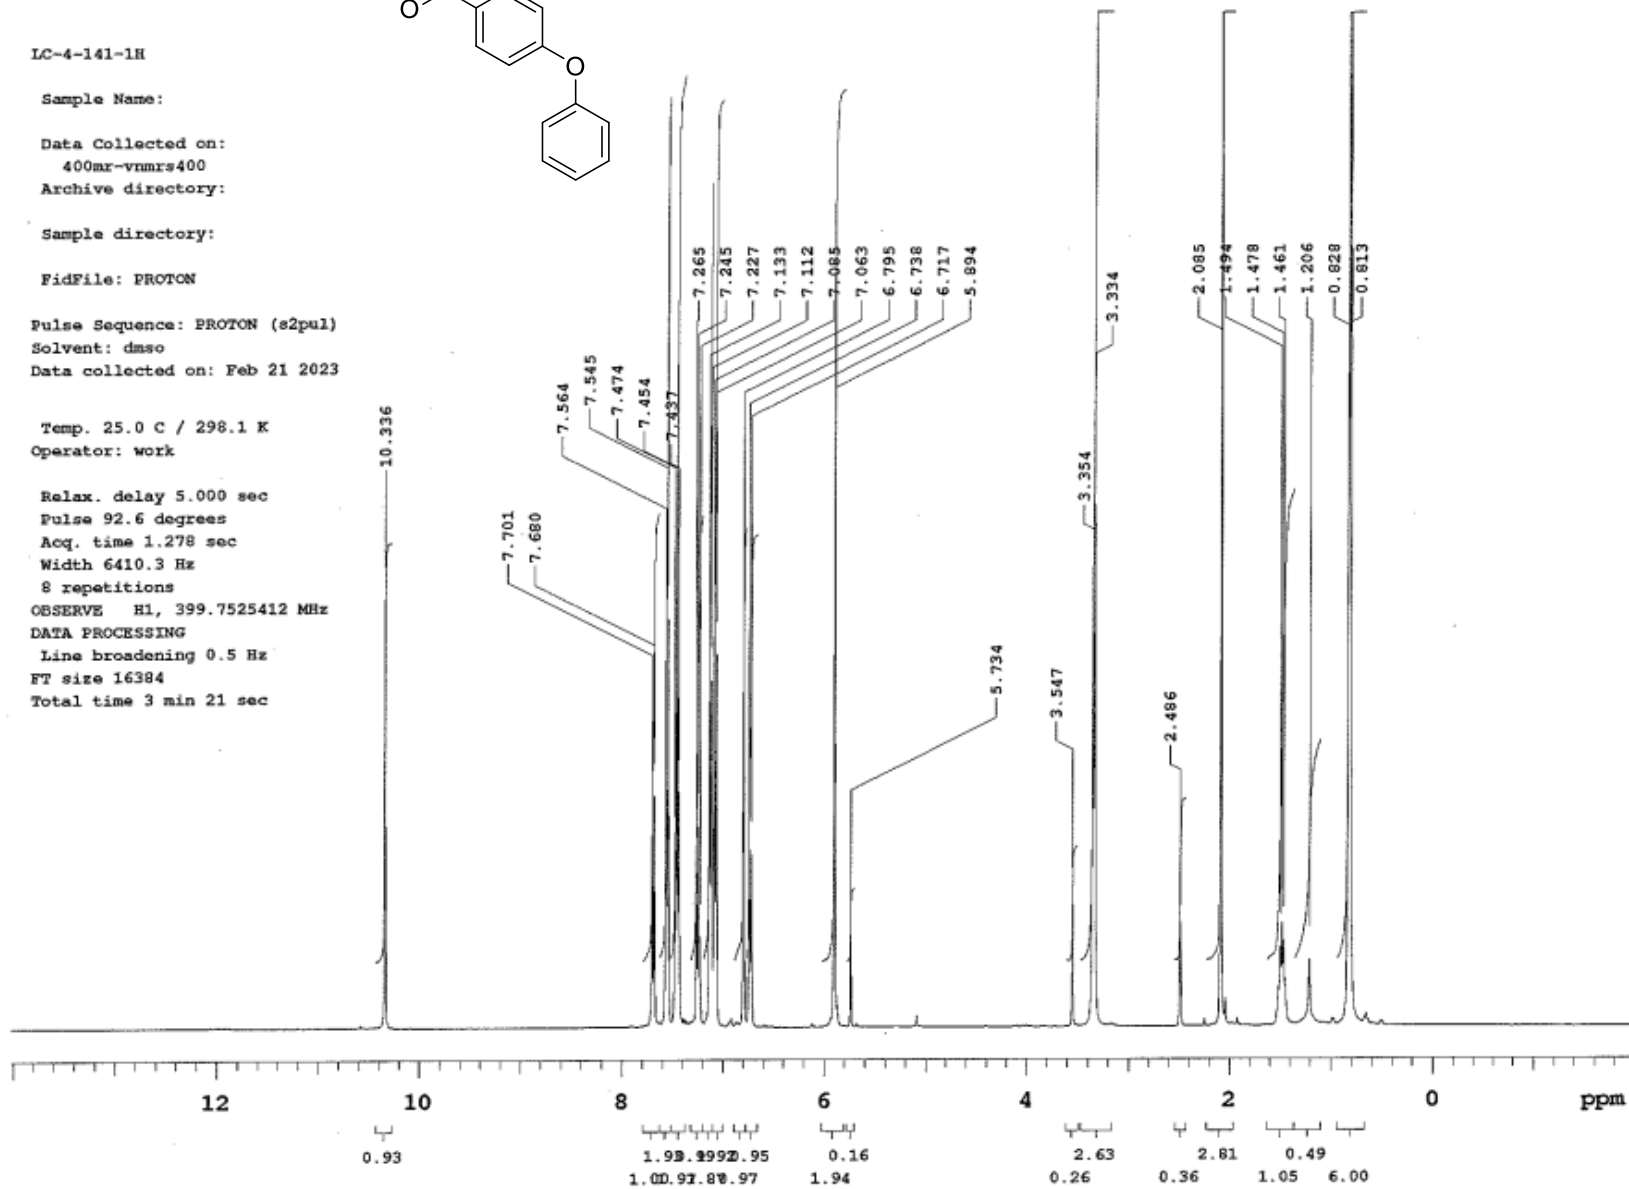

# Compound 3

BDL-2-138-LC-4-141-C13

Sample Name:

Data Collected on:

400mr-vnmrs400

Archive directory:

Sample directory:

FidFile: BDL-2-138-LC-4-141-C13

Pulse Sequence: CARBON (s2pul)

Solvent: dms

Data collected on: Feb 21 2023

Temp. 25.0 C / 298.1 K

Operator: work

Relax. delay 5.000 sec

Pulse 67.7 degrees

Acq. time 0.813 sec

Width 21186.4 Hz

204 repetitions

OBSERVE C13, 100.5178564 MHz

DECOUPLE H1, 399.7545399 MHz

Power 39 dB

continuously on

WALTZ-16 modulated

DATA PROCESSING

Line broadening 3.0 Hz

FT size 32768

Total time 12 hr, 55 min

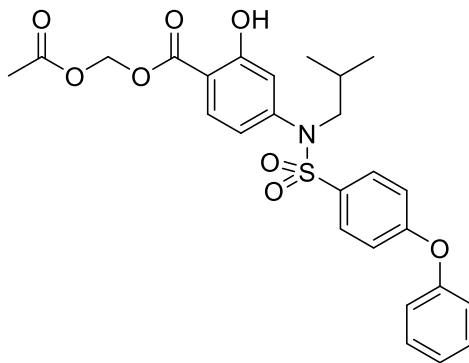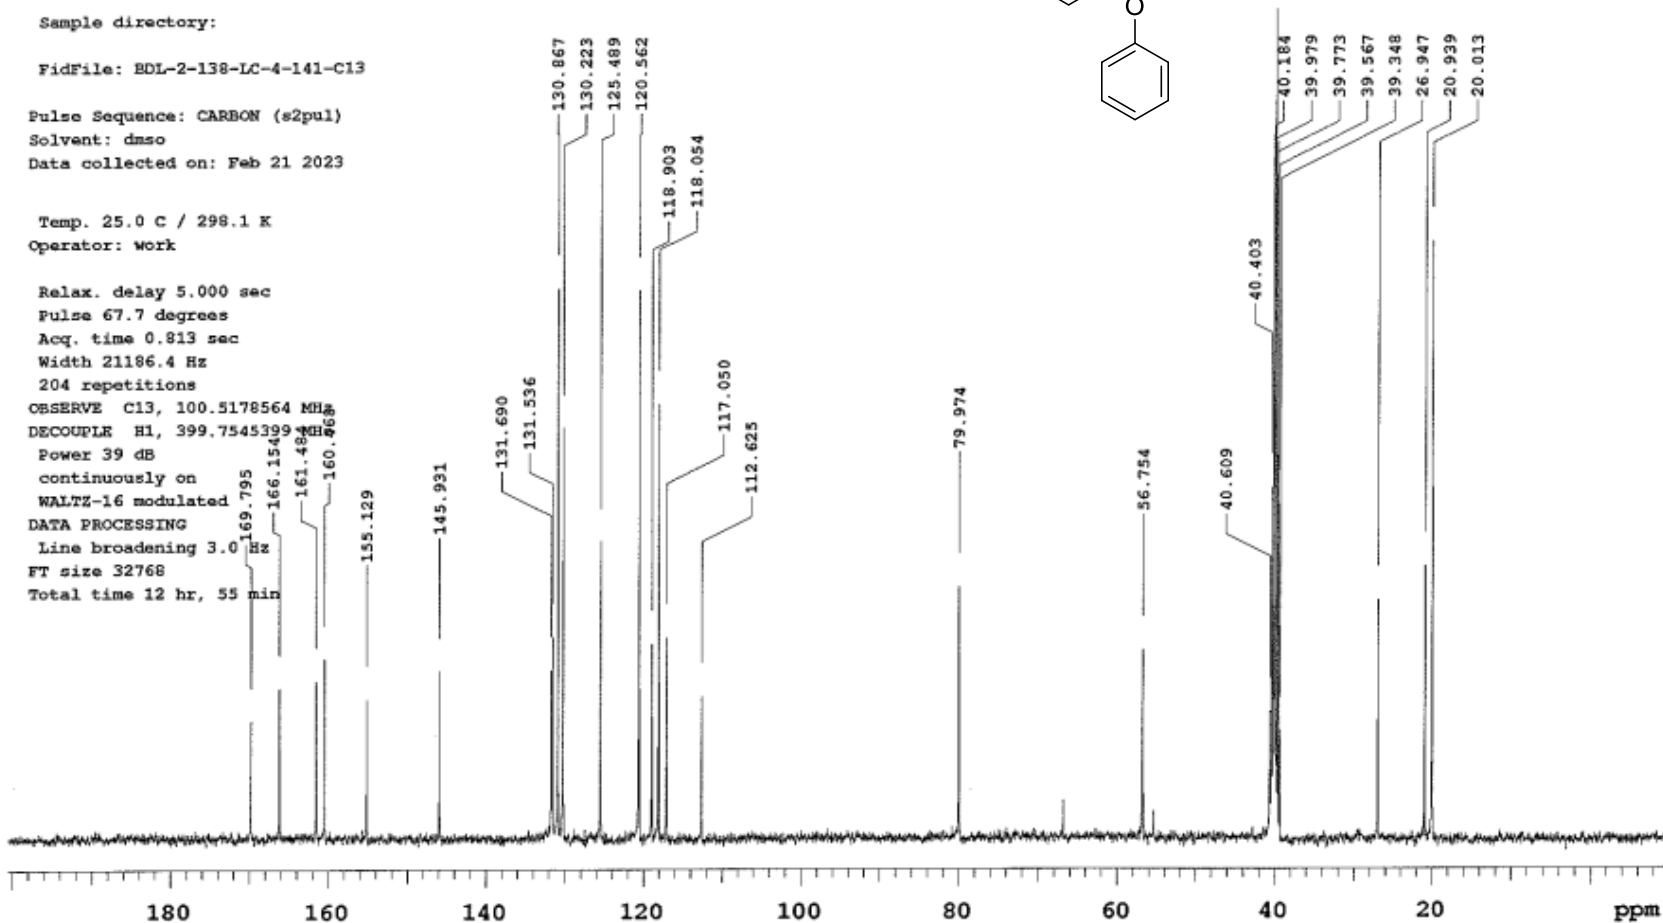

# Compound 4

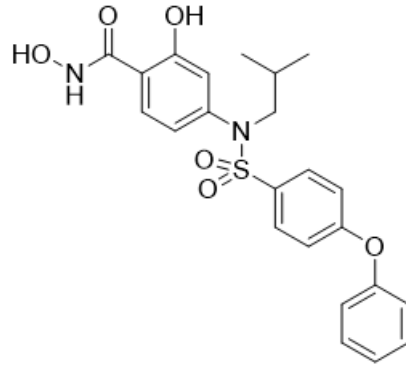

LC-5-061-1H-BDL-rerun

Sample Name:

Data Collected on:  
400mr-vnmrs400

Archive directory:

Sample directory:

FidFile: PROTON

Pulse Sequence: PROTON (s2pul)  
Solvent: dmsc  
Data collected on: Feb 28 2023

Temp. 25.0 C / 298.1 K  
Operator: work

Relax. delay 5.000 sec  
Pulse 92.6 degrees  
Acq. time 1.278 sec  
Width 6410.3 Hz  
8 repetitions  
OBSERVE H1, 399.7525412 MHz  
DATA PROCESSING  
Line broadening 0.5 Hz  
FT size 16384  
Total time 3 min 21 sec

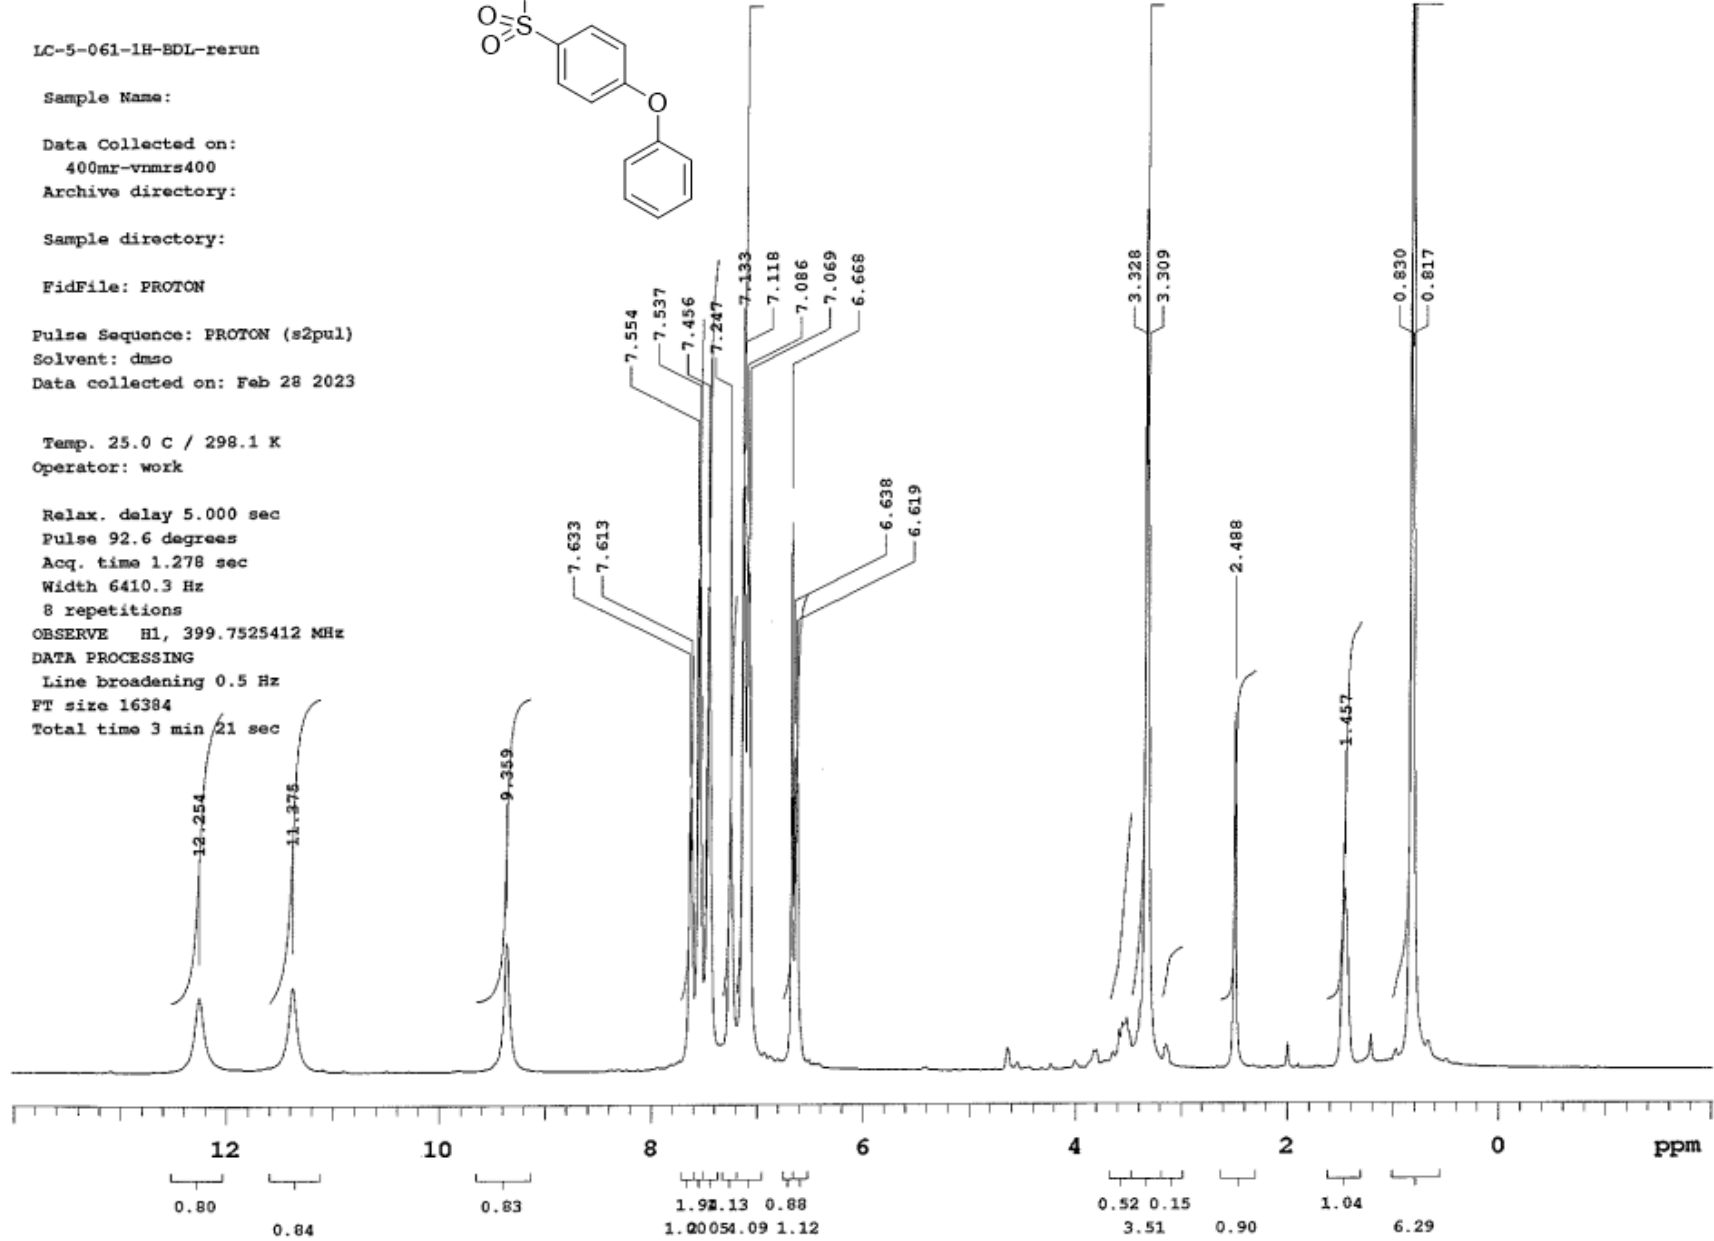

# Compound 4

LC-5-061-C13

Sample Name:

Data Collected on:

400mr-vnmrs400

Archive directory:

Sample directory:

FidFile: CARBON

Pulse Sequence: CARBON (s2pul)

Solvent: dms0

Data collected on: Feb 21 2023

Temp. 25.0 C / 298.1 K

Operator: work

Relax. delay 5.000 sec

Pulse 67.7 degrees

Acq. time 0.813 sec

Width 21186.4 Hz

200 repetitions

OBSERVE C13, 100.5178564 MHz

DECOUPLE H1, 399.7545399 MHz

Power 39 dB

continuously on

WALTZ-16 modulated

DATA PROCESSING

Line broadening 3.0 Hz

FT size 32768

Total time 12 hr, 55 min

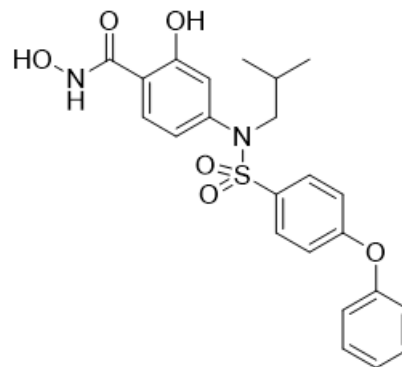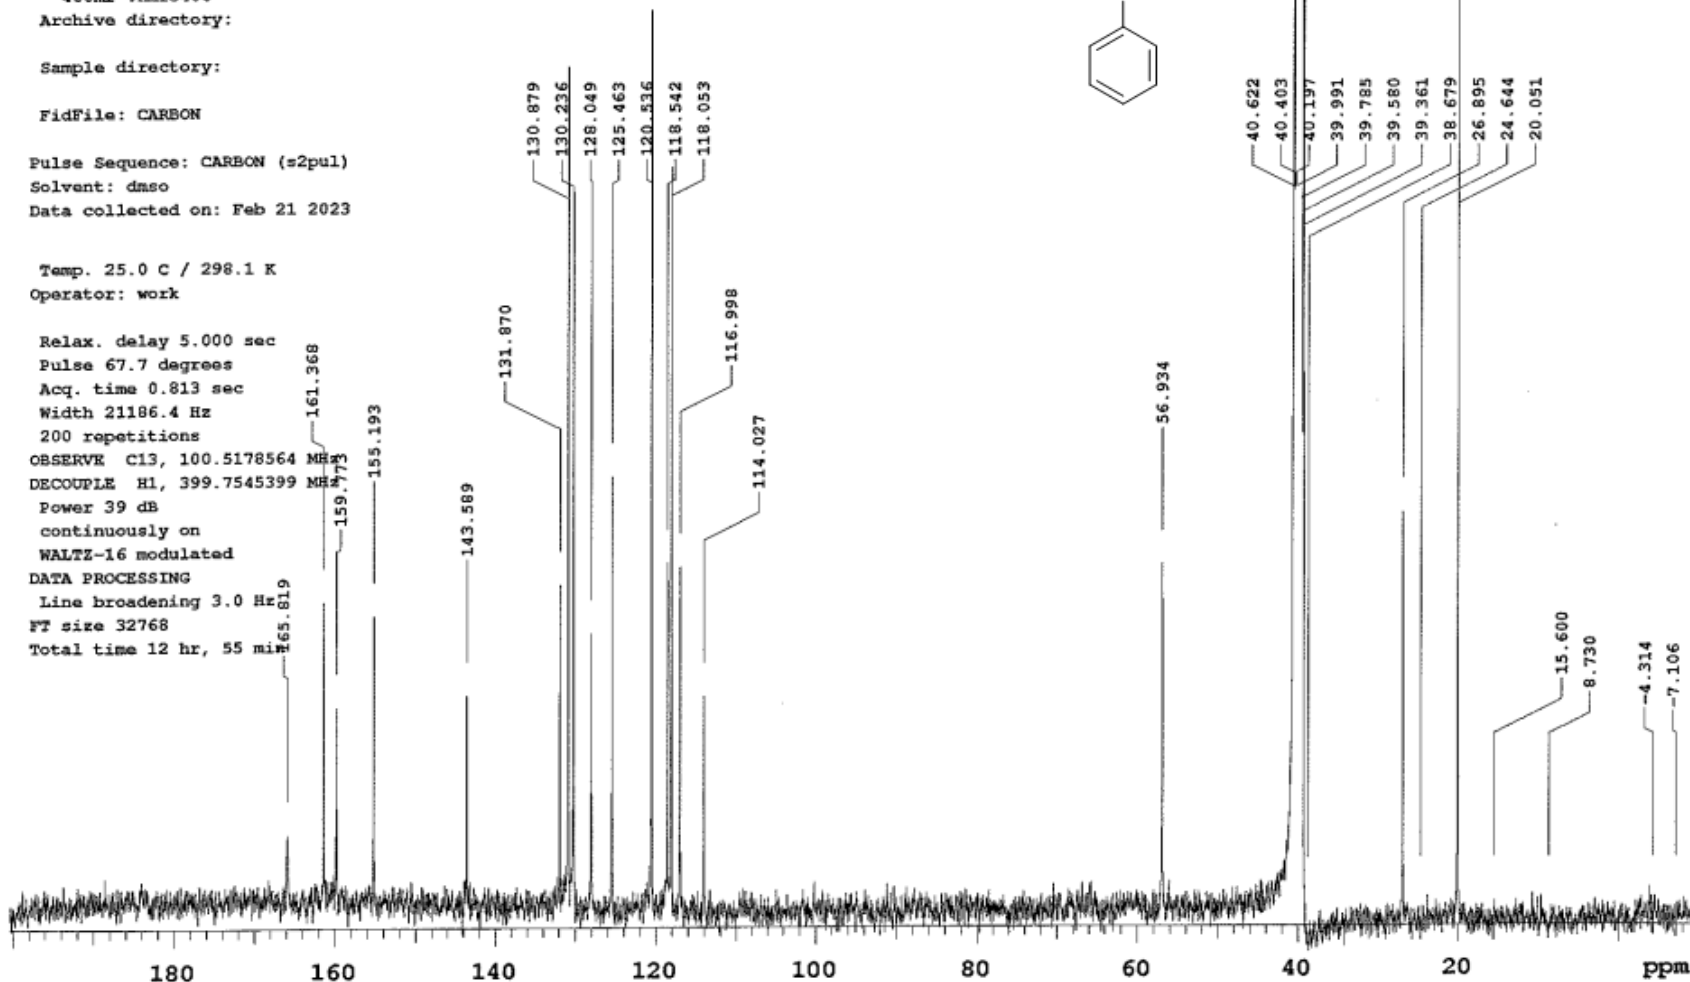

# Compound 5

LC-5-068-1H-2

Sample Name:

Data Collected on:  
400mr-vnmrs400

Archive directory:

Sample directory:

FidFile: PROTON

Pulse Sequence: PROTON (s2pul)

Solvent: dmsc

Data collected on: Mar 13 2023

Temp. 25.0 C / 298.1 K  
Operator: work

Relax. delay 5.000 sec  
Pulse 92.6 degrees  
Acq. time 1.278 sec  
Width 6410.3 Hz  
8 repetitions  
OBSERVE H1, 399.7525412 MHz  
DATA PROCESSING  
Line broadening 0.5 Hz  
FT size 16384  
Total time 3 min 21 sec

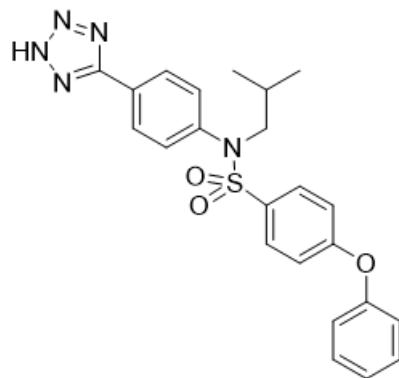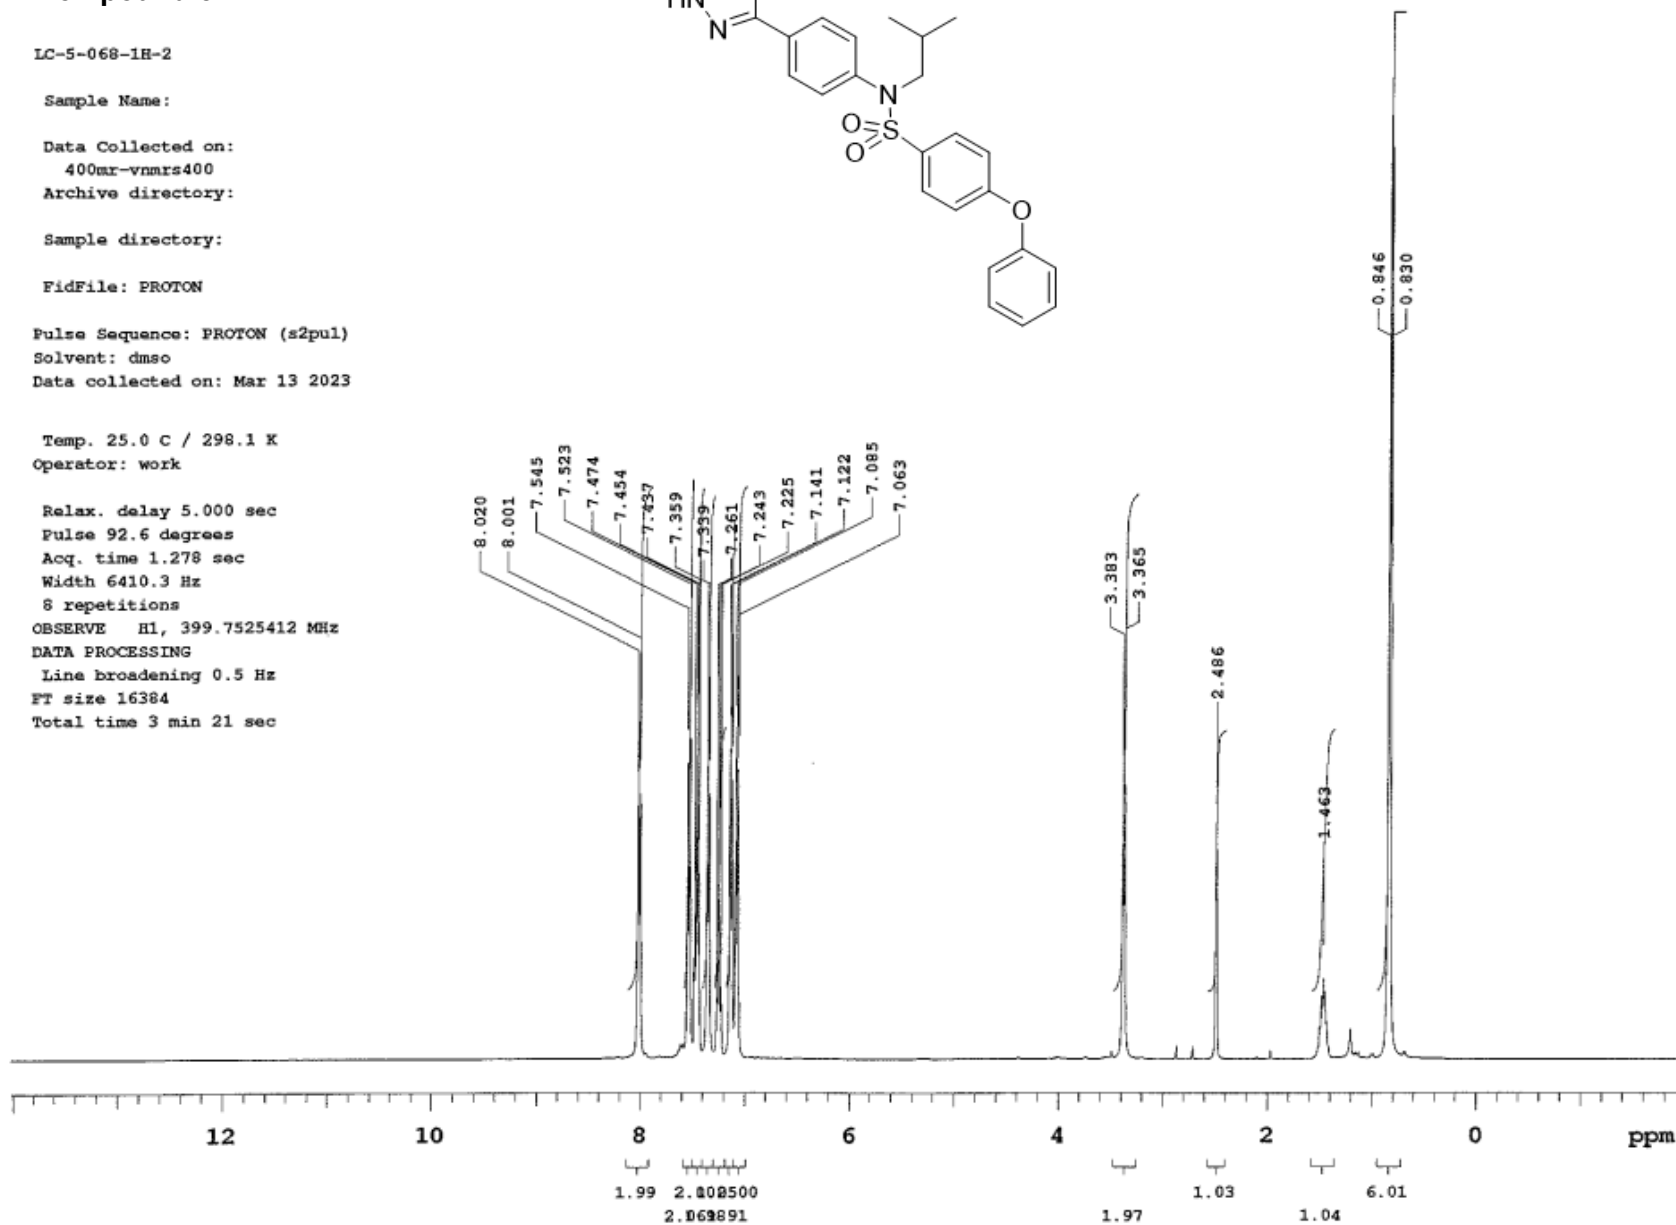

# Compound 5

LC-5-068-C13

Sample Name:

Data Collected on:  
400mr-vnmrs400

Archive directory:

Sample directory:

FidFile: CARBON

Pulse Sequence: CARBON (s2pul)

Solvent: dms

Data collected on: Mar 13 2023

Temp. 25.0 C / 298.1 K

Operator: work

Relax. delay 5.000 sec

Pulse 67.7 degrees

Acq. time 0.813 sec

Width 21186.4 Hz

394 repetitions

OBSERVE C13, 100.5178564 MHz

DECOUPLE H1, 399.7545399 MHz

Power 39 dB

continuously on

WALTZ-16 modulated

DATA PROCESSING

Line broadening 3.0 Hz

FT size 32768

Total time 12 hr, 55 min

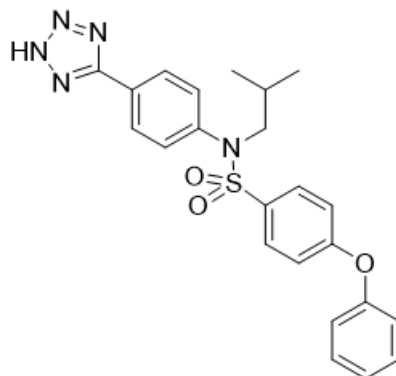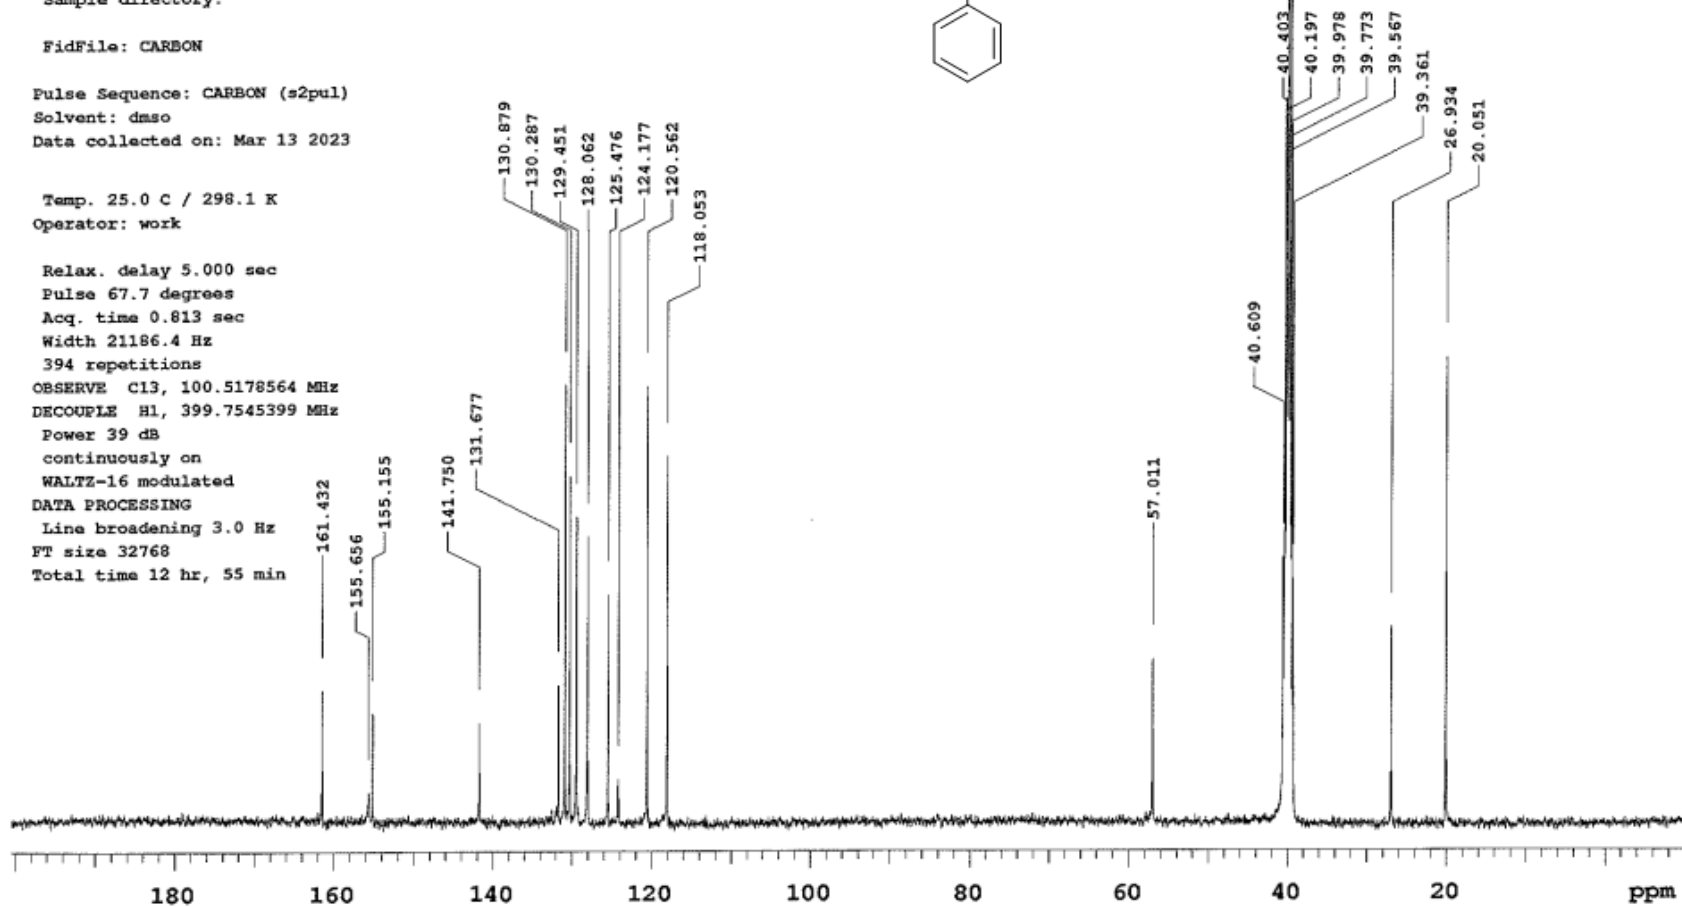



# Compound 6

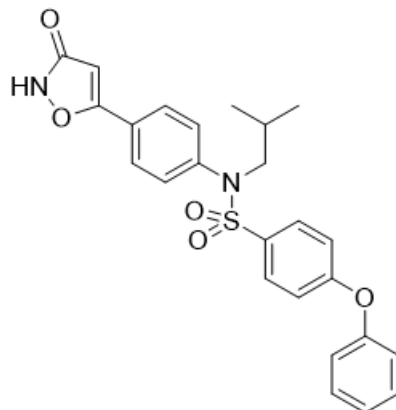

LC-5-069-1H-BDL-rerun

Sample Name:

Data Collected on:

400mr-vnmrs400

Archive directory:

Sample directory:

FidFile: PROTON

Pulse Sequence: PROTON (s2pul)

Solvent: dms0

Data collected on: Feb 28 2023

Temp. 25.0 C / 298.1 K

Operator: work

Relax. delay 5.000 sec

Pulse 79.4 degrees

Acq. time 1.278 sec

Width 6410.3 Hz

8 repetitions

OBSERVE H1, 399.7525411 MHz

DATA PROCESSING

Line broadening 0.5 Hz

FT size 16384

Total time 3 min 21 sec

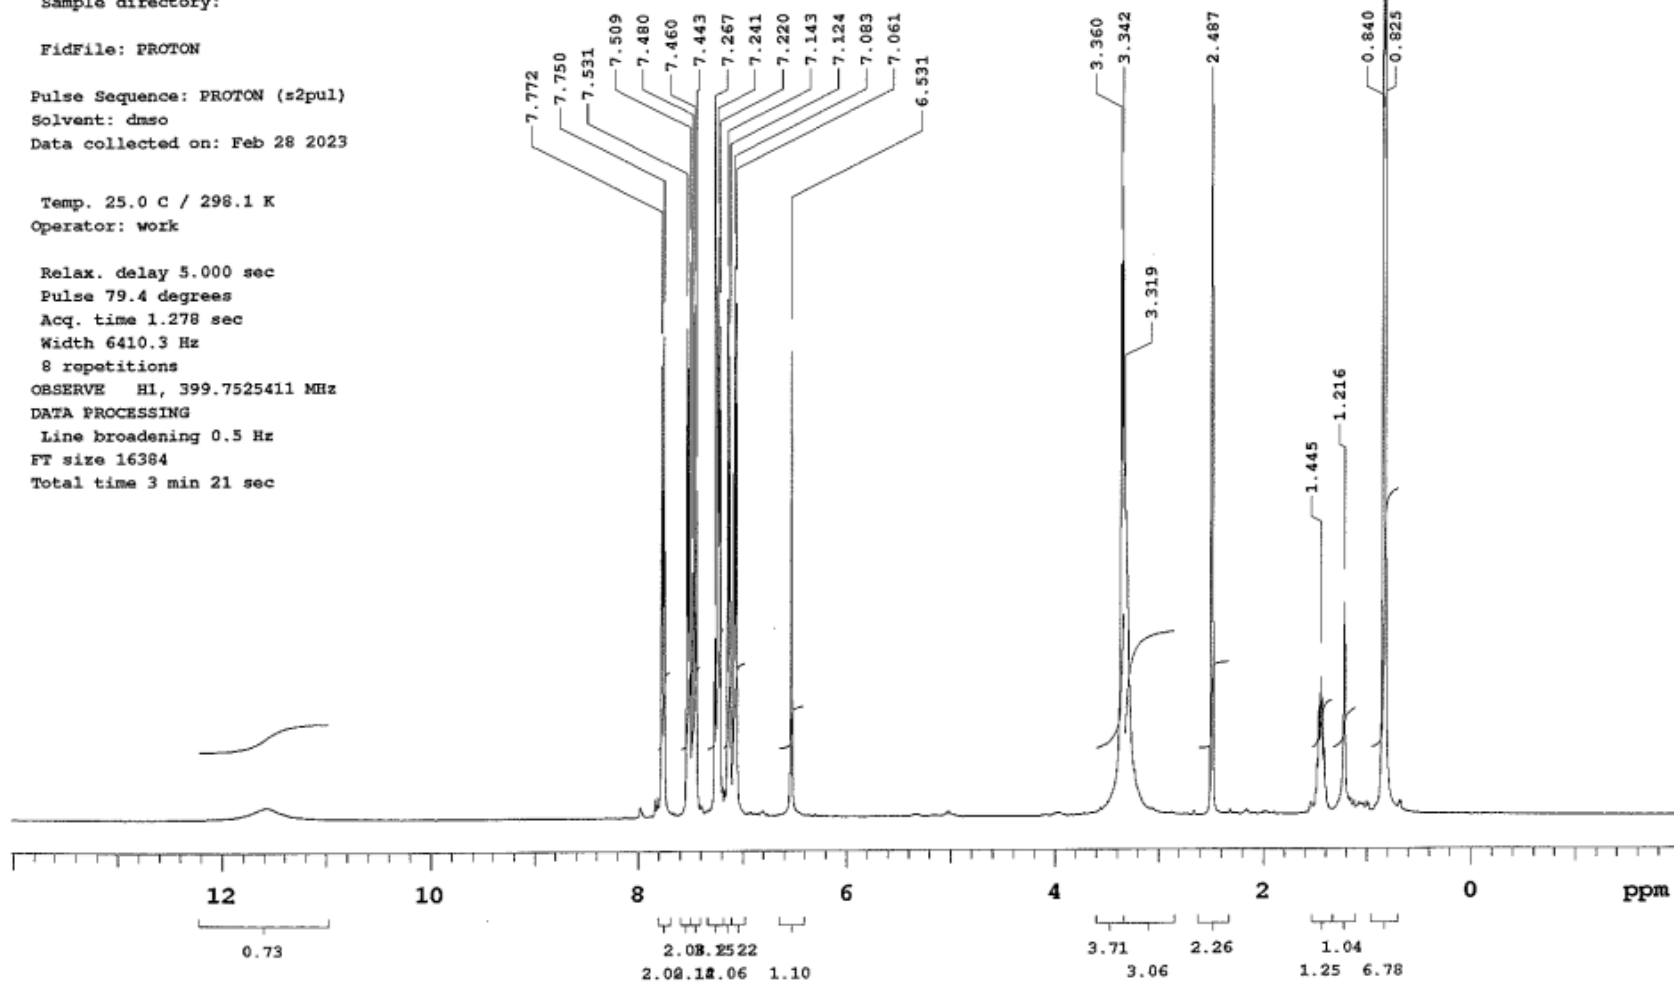

# Compound 6

LC-5-069-C13

Sample Name:

Data Collected on:

400mr-vnars400

Archive directory:

Sample directory:

FidFile: CARBON

Pulse Sequence: CARBON (s2pul)

Solvent: dmsc

Data collected on: Feb 21 2023

Temp. 25.0 C / 298.1 K

Operator: work

Relax. delay 5.000 sec

Pulse 67.7 degrees

Acq. time 0.813 sec

Width 21186.4 Hz

420 repetitions

OBSERVE C13, 100.5178564 MHz

DECOUPLE H1, 399.7545399 MHz

Power 39 dB

continuously on

WALTZ-16 modulated

DATA PROCESSING

Line broadening 3.

FT size 32768

Total time 12 hr, 5 min

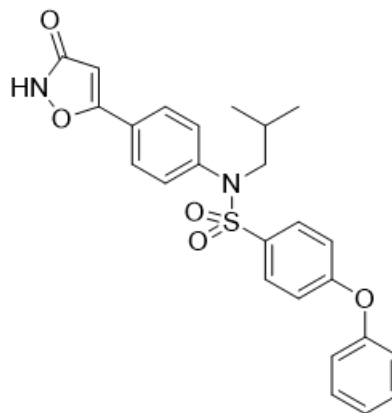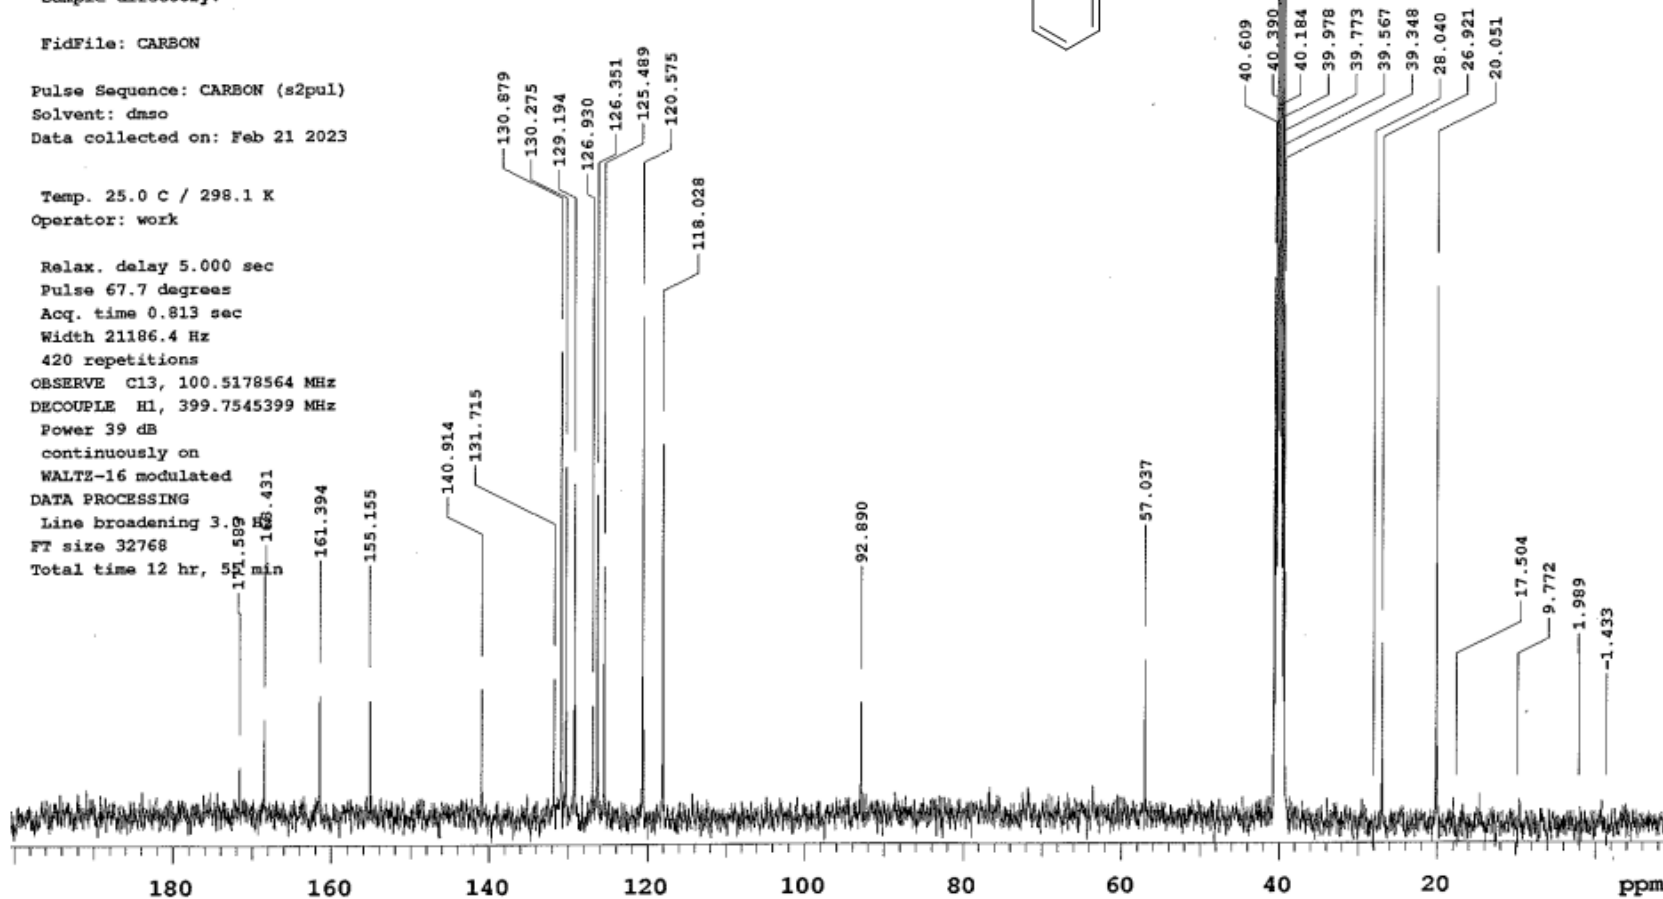

# Compound 7a

LC-5-112-BDL-reprocess

Sample Name:

Data Collected on:

400mr-vnmrs400

Archive directory:

Sample directory:

FidFile: LC-5-112

Pulse Sequence: PROTON (s2pul)

Solvent: dmsc

Data collected on: Jan 21 2016

Operator: work

Relax. delay 2.000 sec

Pulse 79.4 degrees

Acq. time 1.278 sec

Width 6410.3 Hz

4 repetitions

OBSERVE H1, 399.7531926 MHz

DATA PROCESSING

Line broadening 0.5 Hz

FT size 16384

Total time 0 min 13 sec

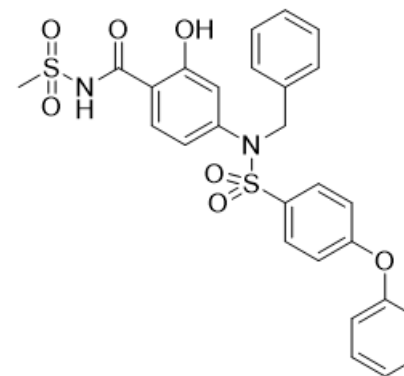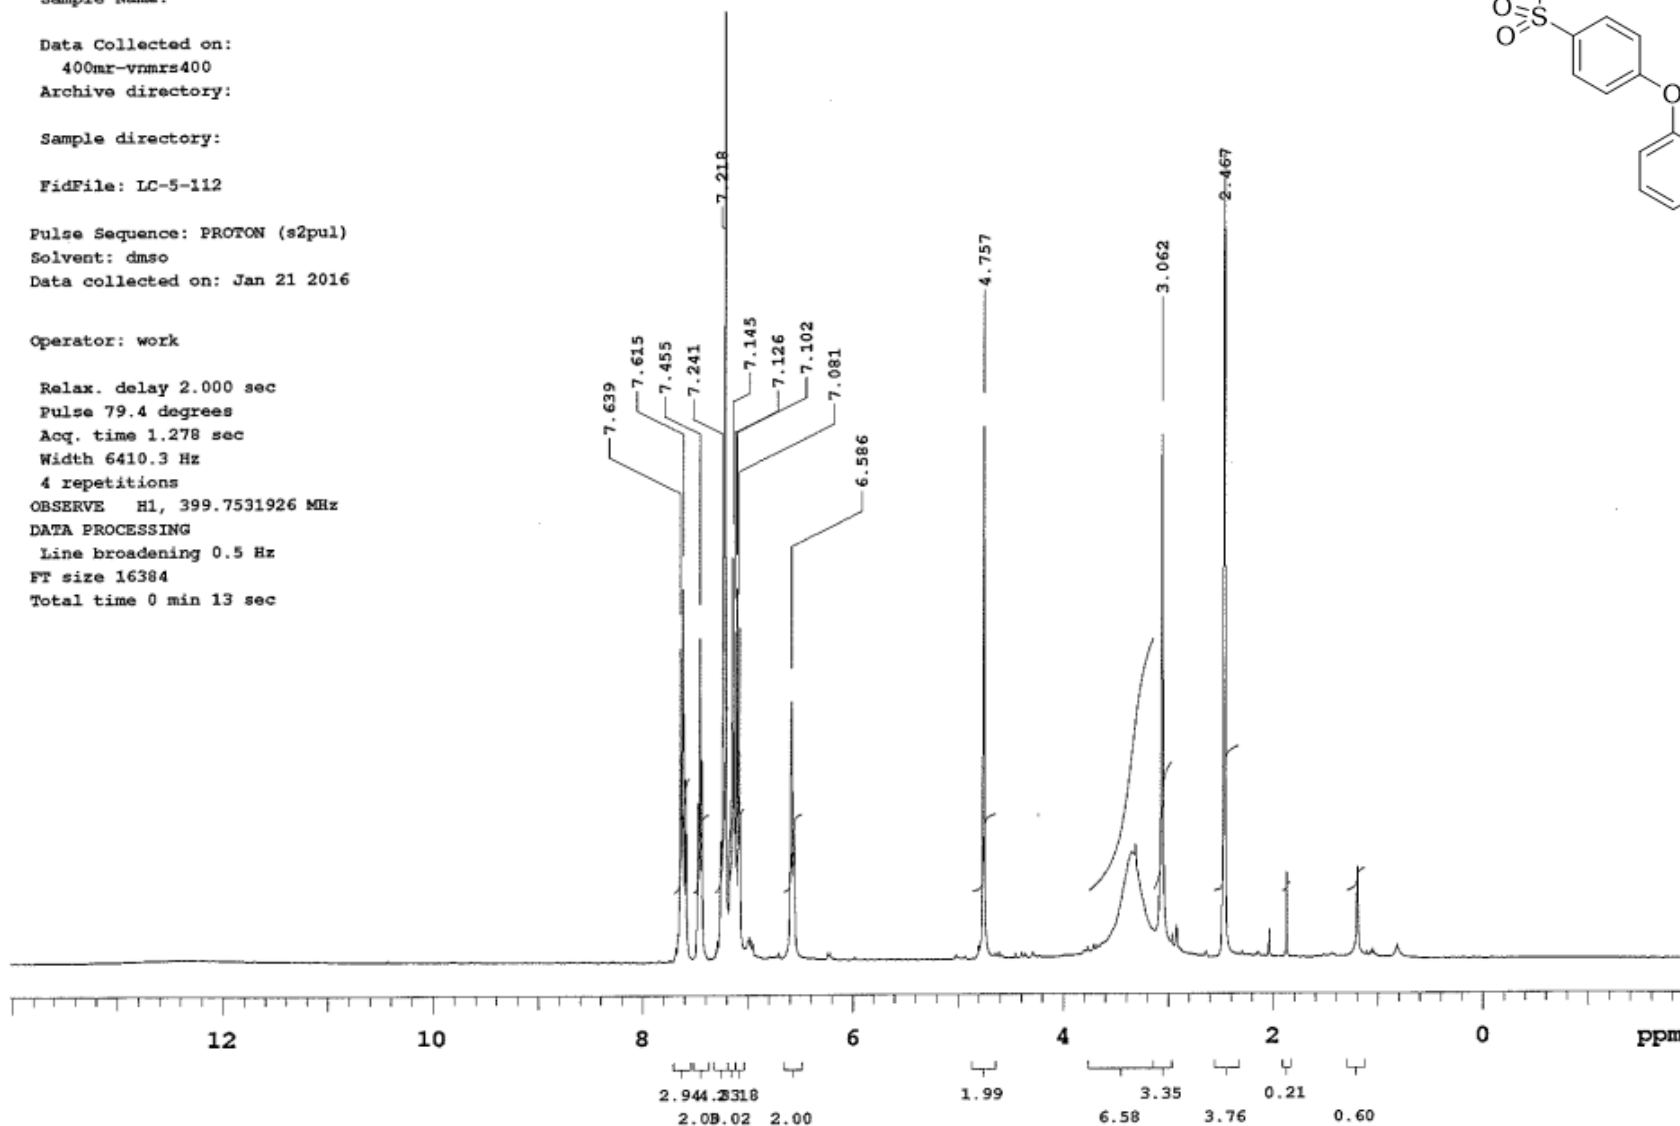

# Compound 7b

LC-5-096/BDL-2-139

Sample Name:

Data Collected on:

400mr-vnmrs400

Archive directory:

Sample directory:

FidFile: PROTON

Pulse Sequence: PROTON (s2pul)

Solvent: dmsc

Data collected on: Dec 28 2015

Operator: work

Relax. delay 3.000 sec

Pulse 79.4 degrees

Acq. time 1.278 sec

Width 6410.3 Hz

16 repetitions

OBSERVE H1, 399.7531926 MHz

DATA PROCESSING

Line broadening 0.5 Hz

FT size 16384

Total time 1 min 8 sec

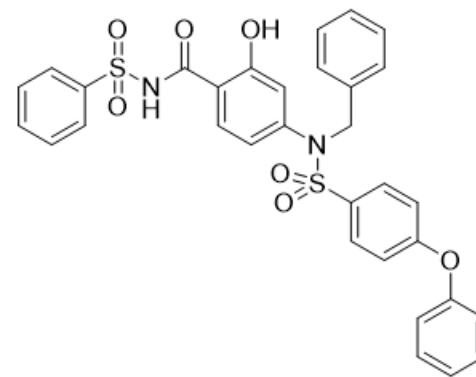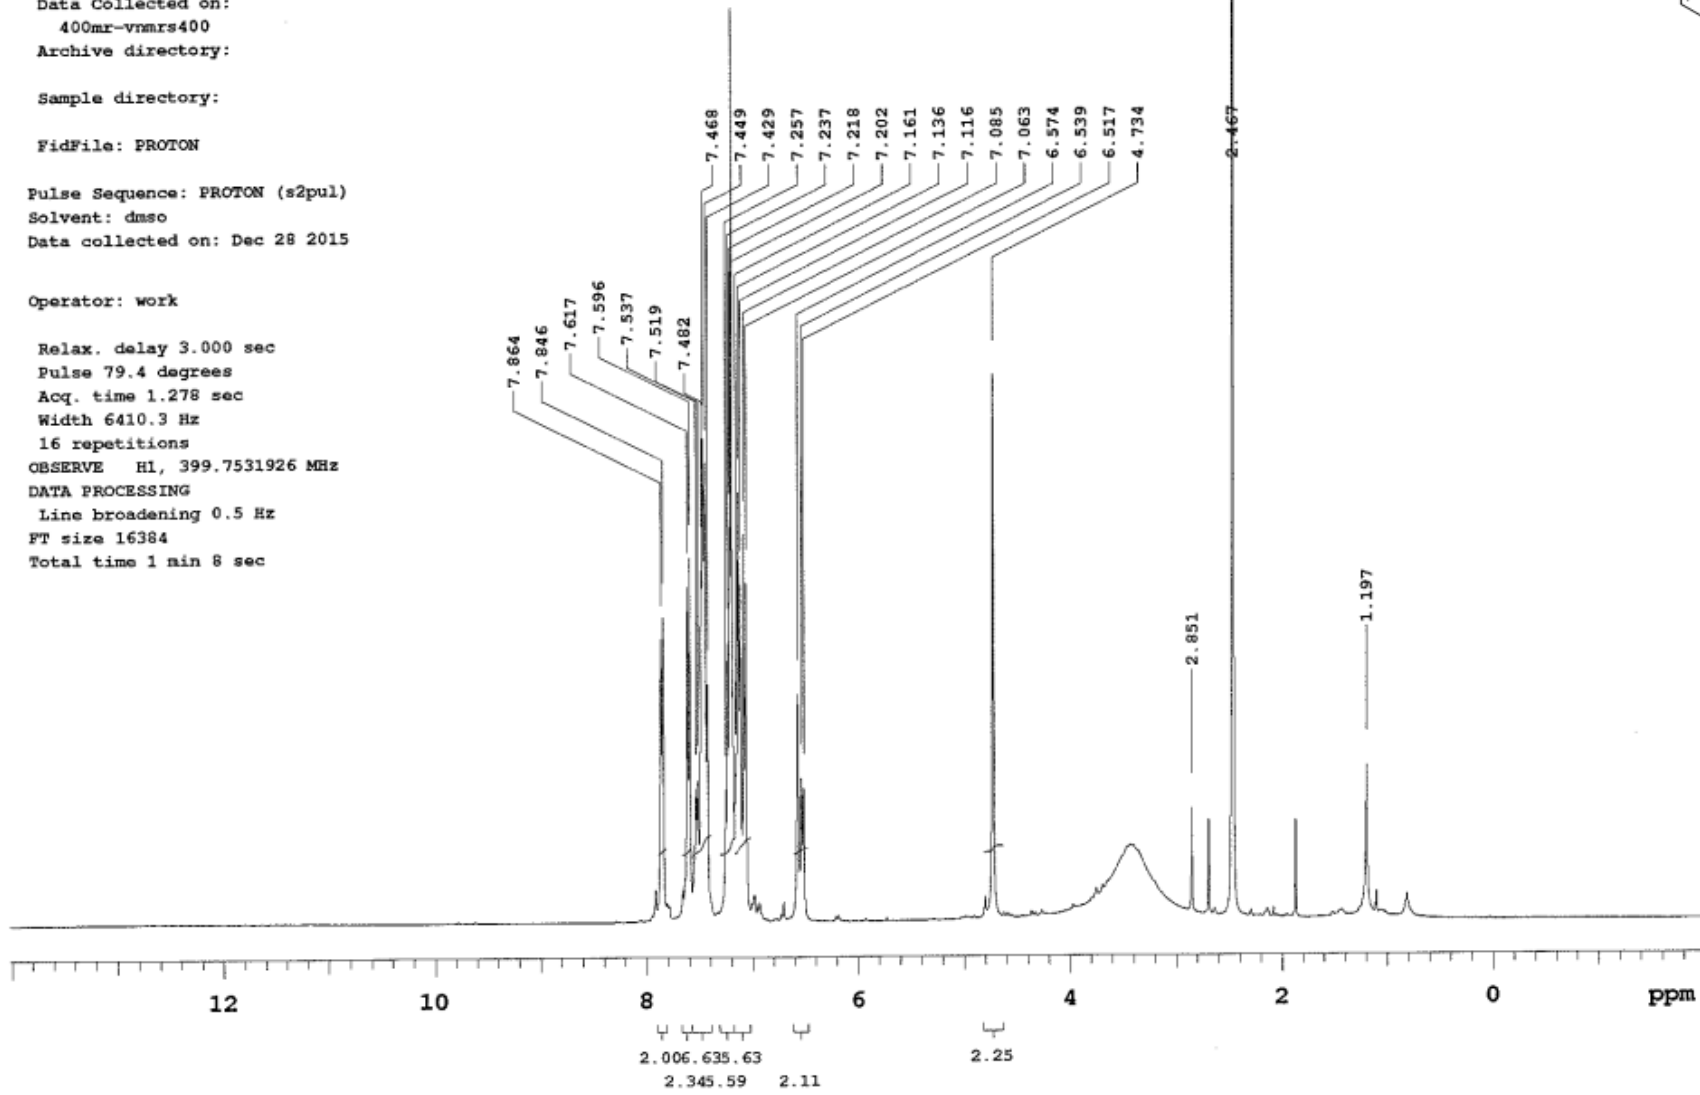

# Compound 7b

LC-5-096-C13

Sample Name:

Data Collected on:

400mr-vnars400

Archive directory:

Sample directory:

FidFile: CARBON

Pulse Sequence: CARBON (s2pul)

Solvent: dmsc

Data collected on: Feb 21 2023

Temp. 25.0 C / 298.1 K

Operator: work

Relax. delay 5.000 sec

Pulse 67.7 degrees

Acq. time 0.813 sec

Width 21186.4 Hz

400 repetitions

OBSERVE C13, 100.5178564 MHz

DECOUPLE H1, 399.7545399 MHz

Power 39 dB

continuously on

WALTZ-16 modulated

DATA PROCESSING

Line broadening 3.0 Hz

FT size 32768

Total time 12 hr, 55 min

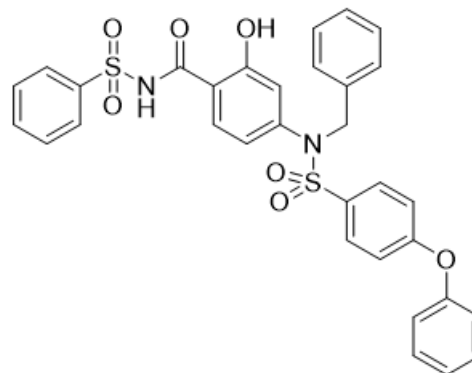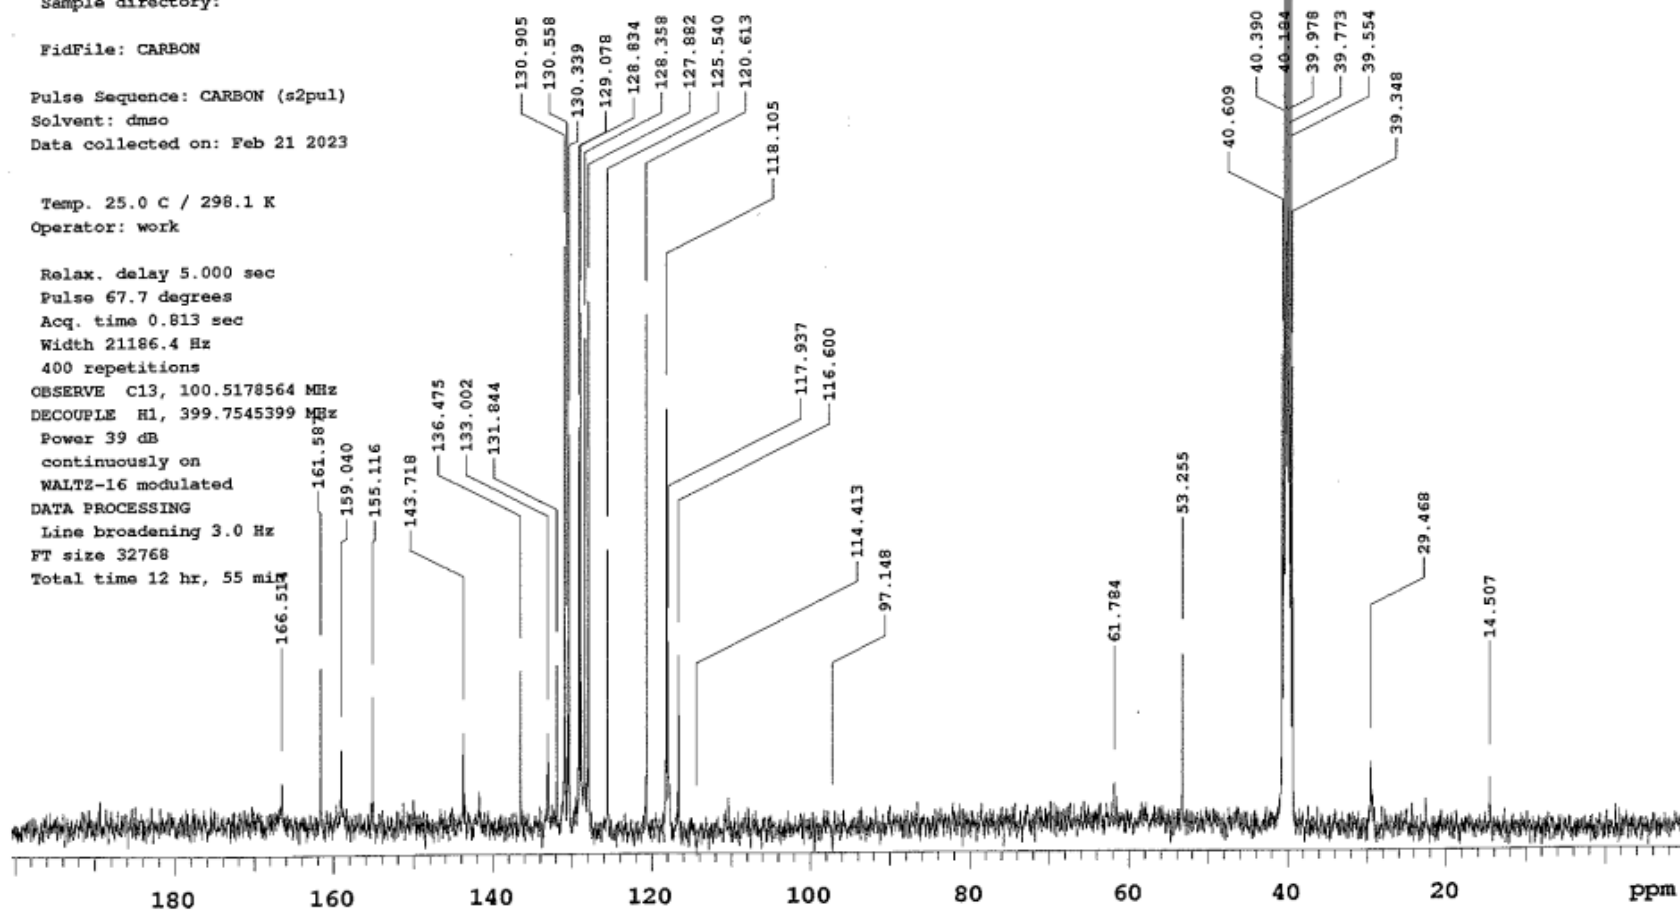

# Compound 7c

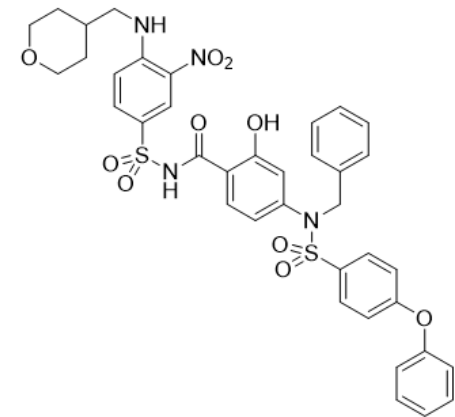

LC-5-107-1H-BDL-rerun-reprocess

Sample Name:

Data Collected on:

400mr-vmars400

Archive directory:

Sample directory:

FidFile: LC-5-107-1H-BDL-rerun

Pulse Sequence: PROTON (s2pul)

Solvent: dmso

Data collected on: Feb 28 2023

Temp. 25.0 C / 298.1 K

Operator: work

Relax. delay 5.000 sec

Pulse 92.6 degrees

Acq. time 1.278 sec

Width 6410.3 Hz

4 repetitions

OBSERVE H1, 399.7525412 MHz

DATA PROCESSING

Line broadening 0.5 Hz

FT size 16384

Total time 3 min 21 sec

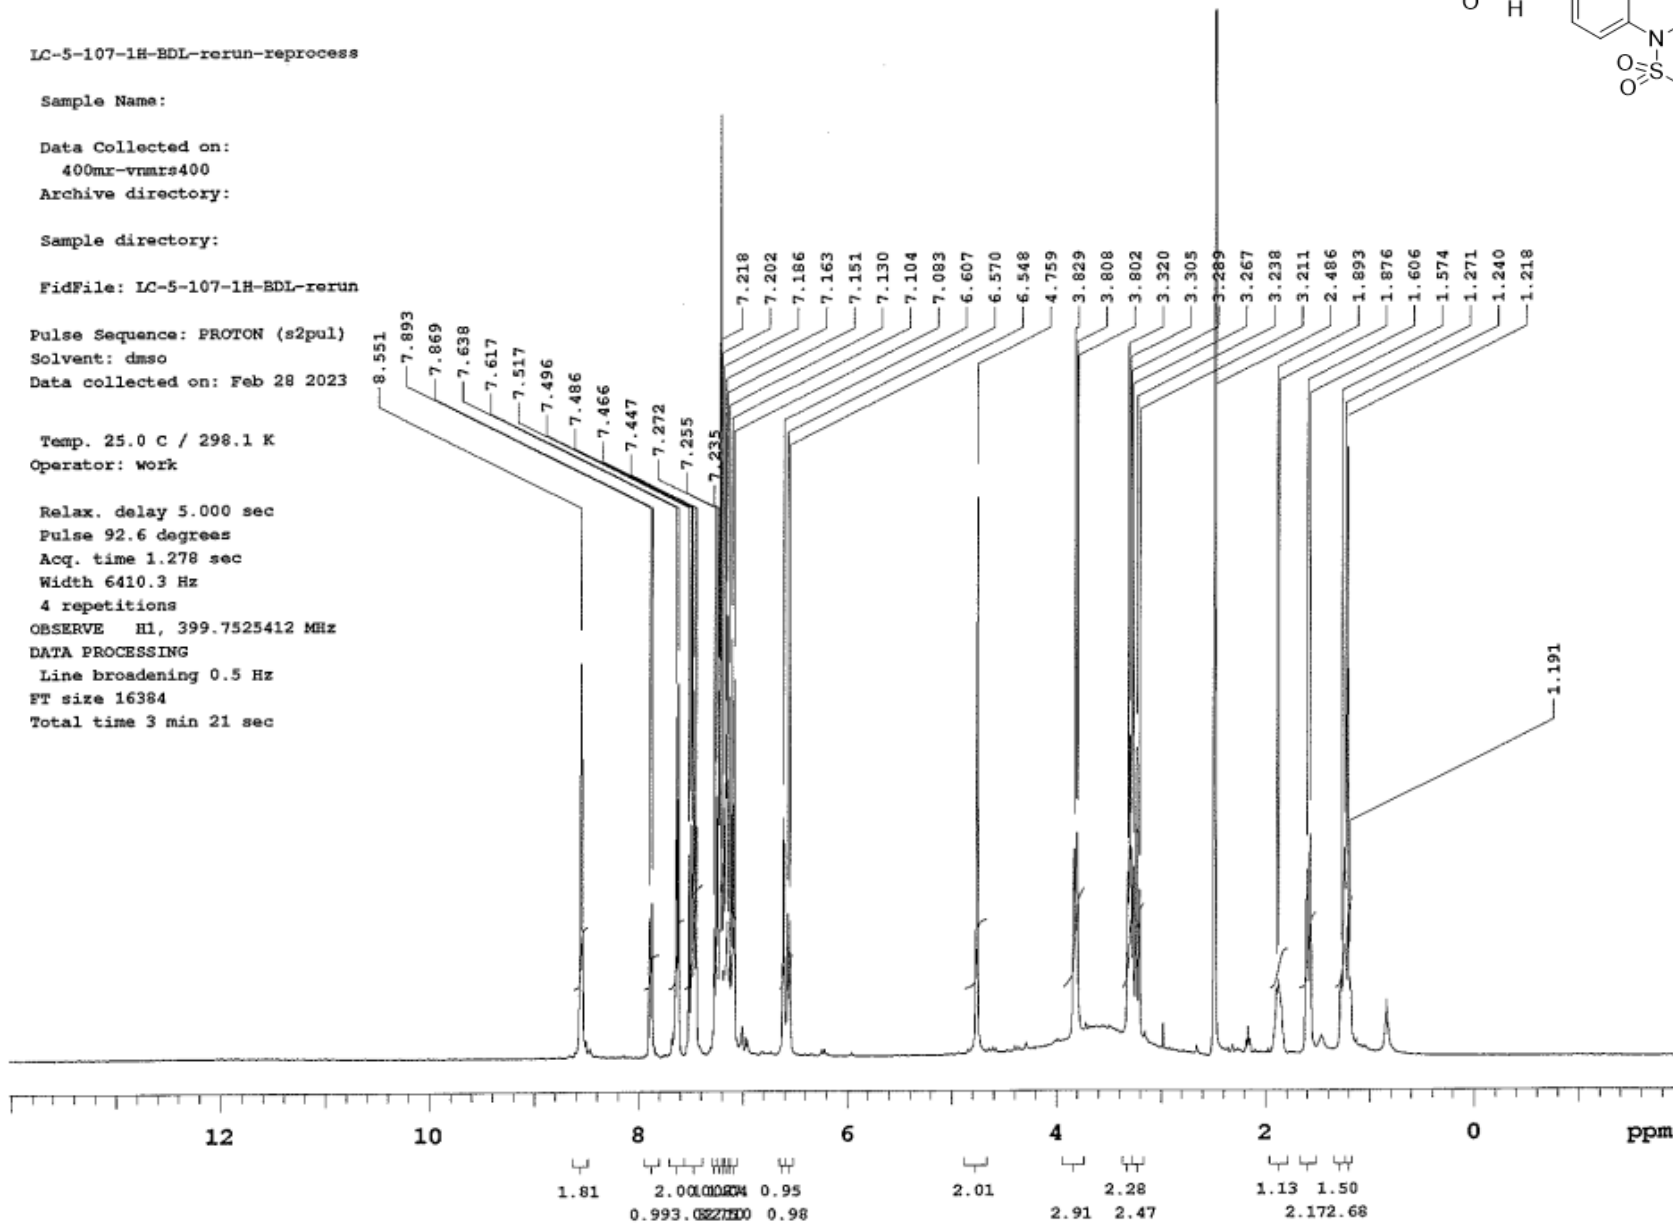

# Compound 7c

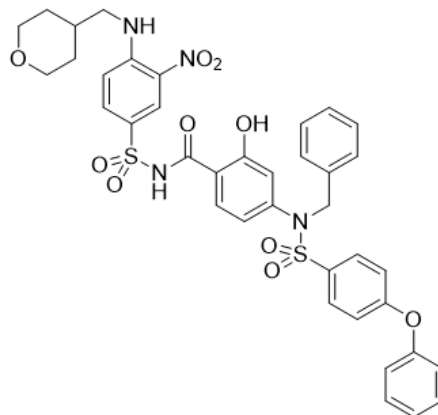

LC-5-107-C13

Sample Name:

Data Collected on:

400mr-vmars400

Archive directory:

Sample directory:

FidFile: CARBON

Pulse Sequence: CARBON (s2pull)

Solvent: dms0

Data collected on: Feb 23 2023

Temp. 25.0 C / 298.1 K

Operator: wor

Acq. time 0.813 sec

Width 21186.4 Hz

1431 repetitions

OBSERVE C13, 100.5178564 MHz

DECOUPLE H1, 399.7545399 MHz

Power 39 dB

continuously on

WALTZ-16 modulated

DATA PROCESSING

Line broadening 3.0 Hz

FT size 32768

Total time 12 hr, 55 min

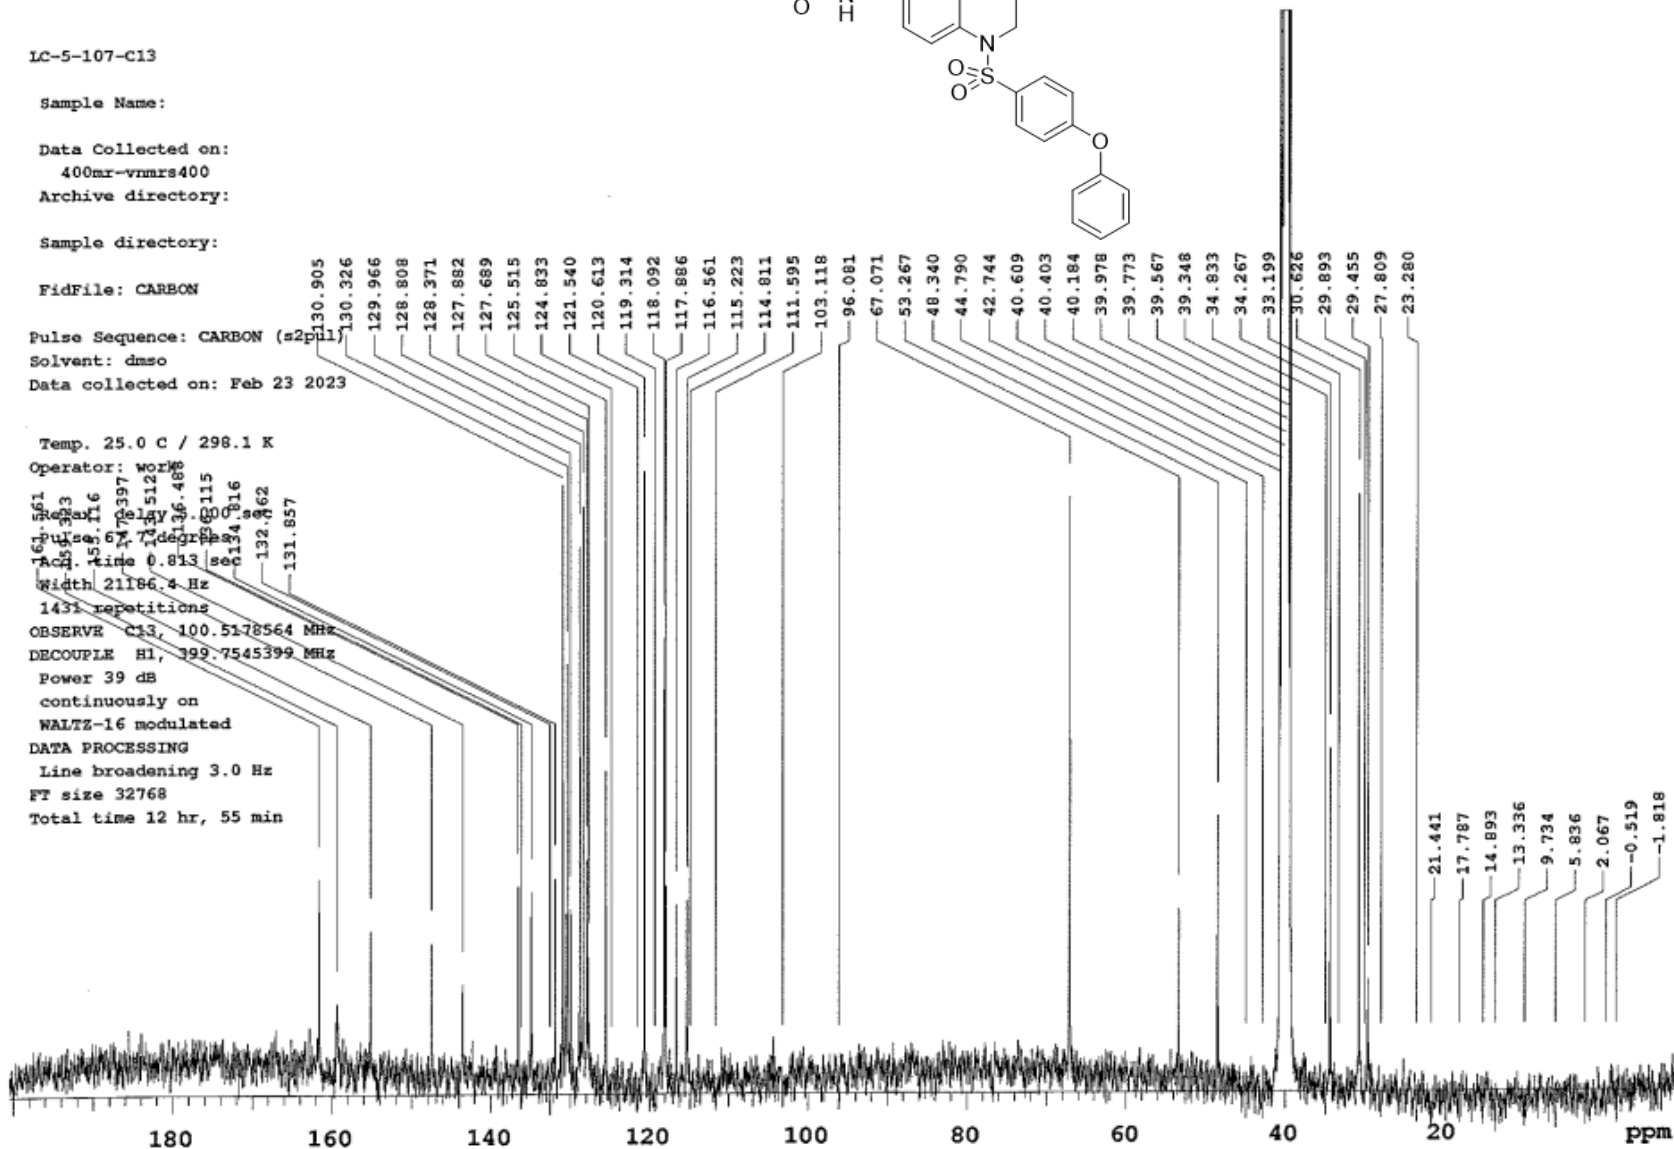

# Compound 7d

LC-5-131-1H-BDL-rerun-reprocess

Sample Name:

Data Collected on:

400mr-vnmrs400

Archive directory:

Sample directory:

FidFile: LC-5-131-1H-BDL-rerun

Pulse Sequence: PROTON (s2pul)

Solvent: dms0

Data collected on: Feb 28 2023

Temp. 25.0 C / 298.1 K

Operator: work

Relax. delay 5.000 sec

Pulse 92.6 degrees

Acq. time 1.278 sec

Width 6410.3 Hz

8 repetitions

OBSERVE H1, 399.7525412 MHz

DATA PROCESSING

Line broadening 0.5 Hz

FT size 16384

Total time 3 min 21 sec

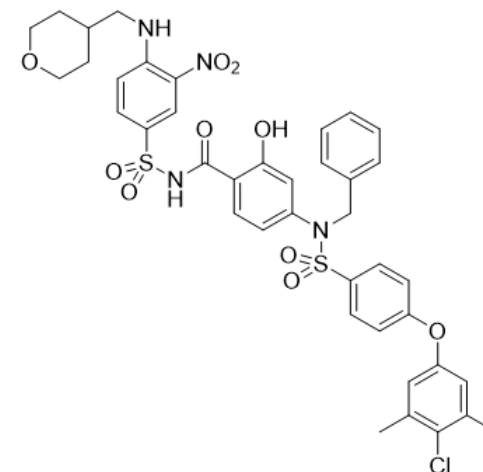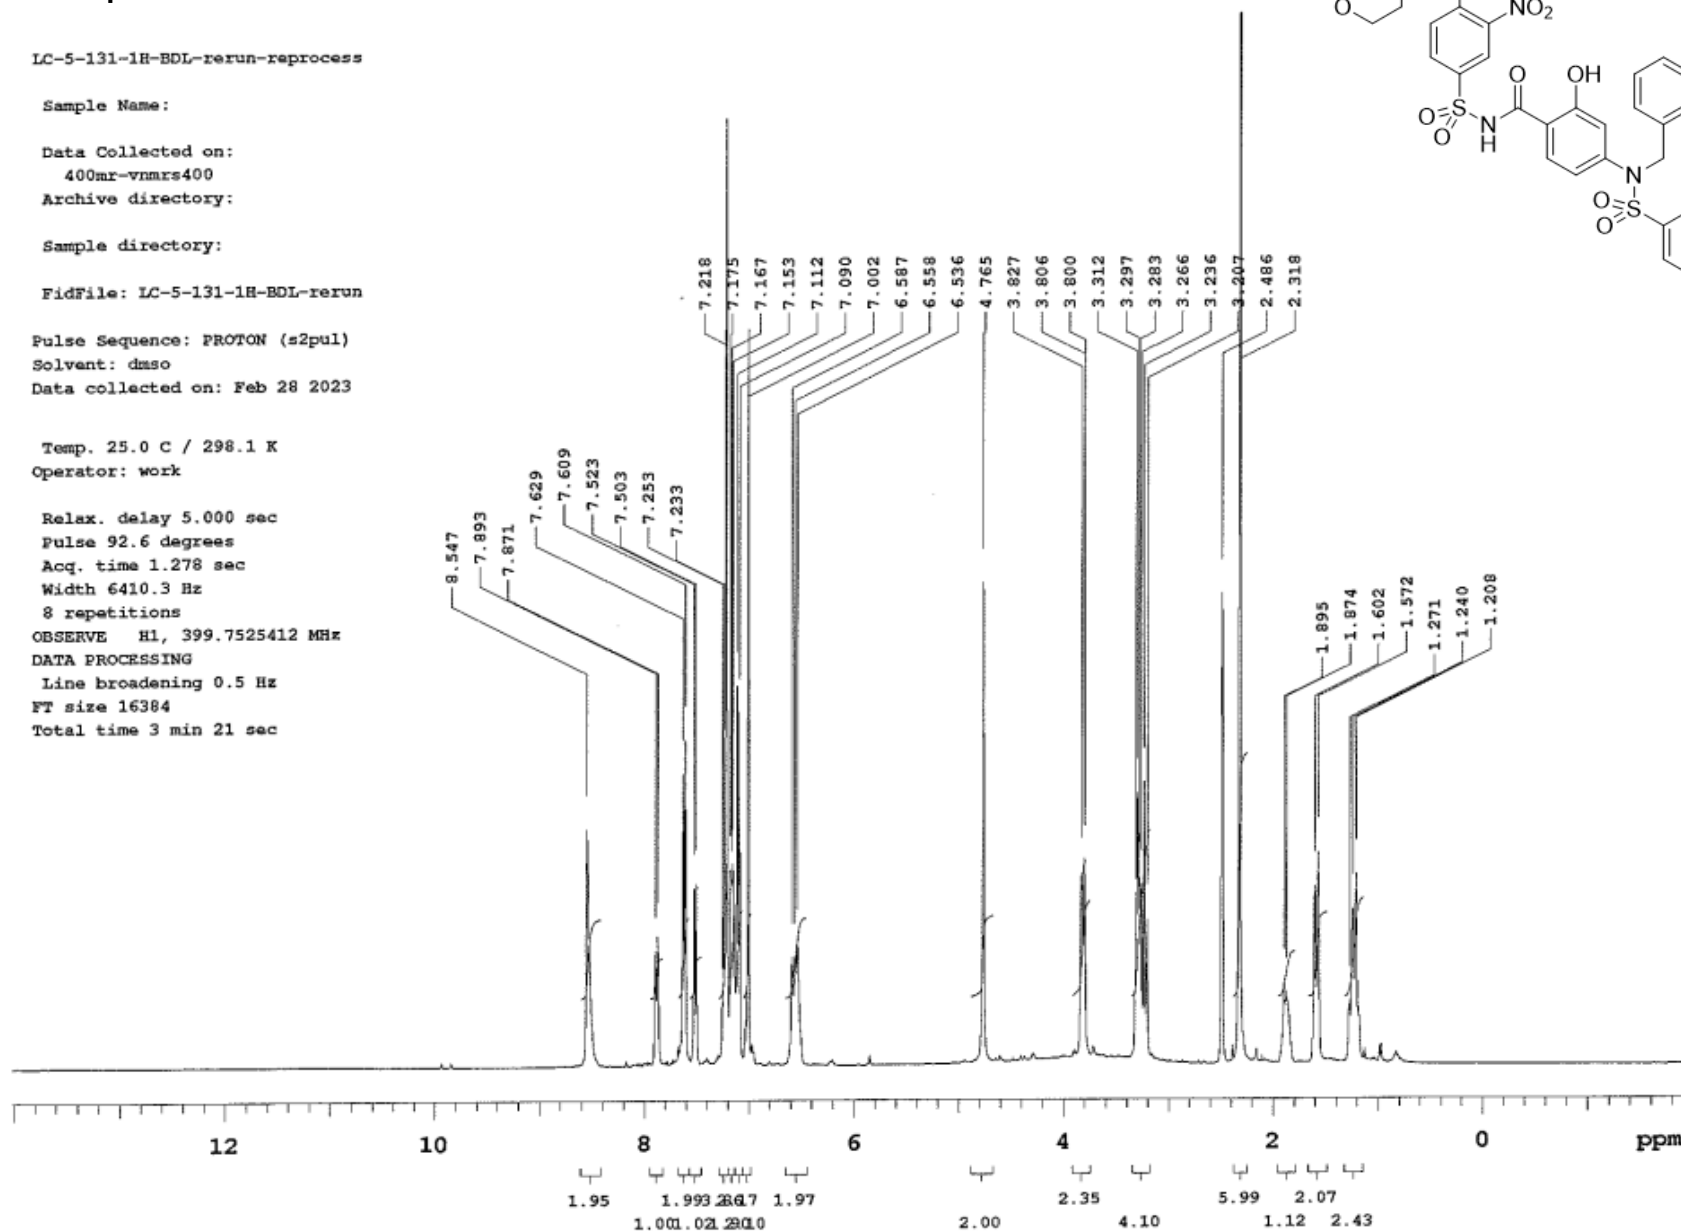



# Compound 7d

LC-5-131-C13

Sample Name:

Data Collected on:

400mr-vnars400

Archive directory:

Sample directory:

FidFile: CARBON

Pulse Sequence: CARBON (s2pul)

Solvent: dmsc

Data collected on: Feb 23 2023

Temp. 25.0 C / 298.1 K

Operator: work

Relax. delay 5.000 sec

Pulse 67.7 degrees

Acq. time 0.813 sec

Width 21186.4 Hz

601 repetitions

OBSERVE C13, 100.5178564 MHz

DECOUPLE H1, 399.7545399 MHz

Power 39 dB

continuously on

WALTZ-16 modulated

DATA PROCESSING

Line broadening 3.0 Hz

FT size 32768

Total time 12 hr, 55 min

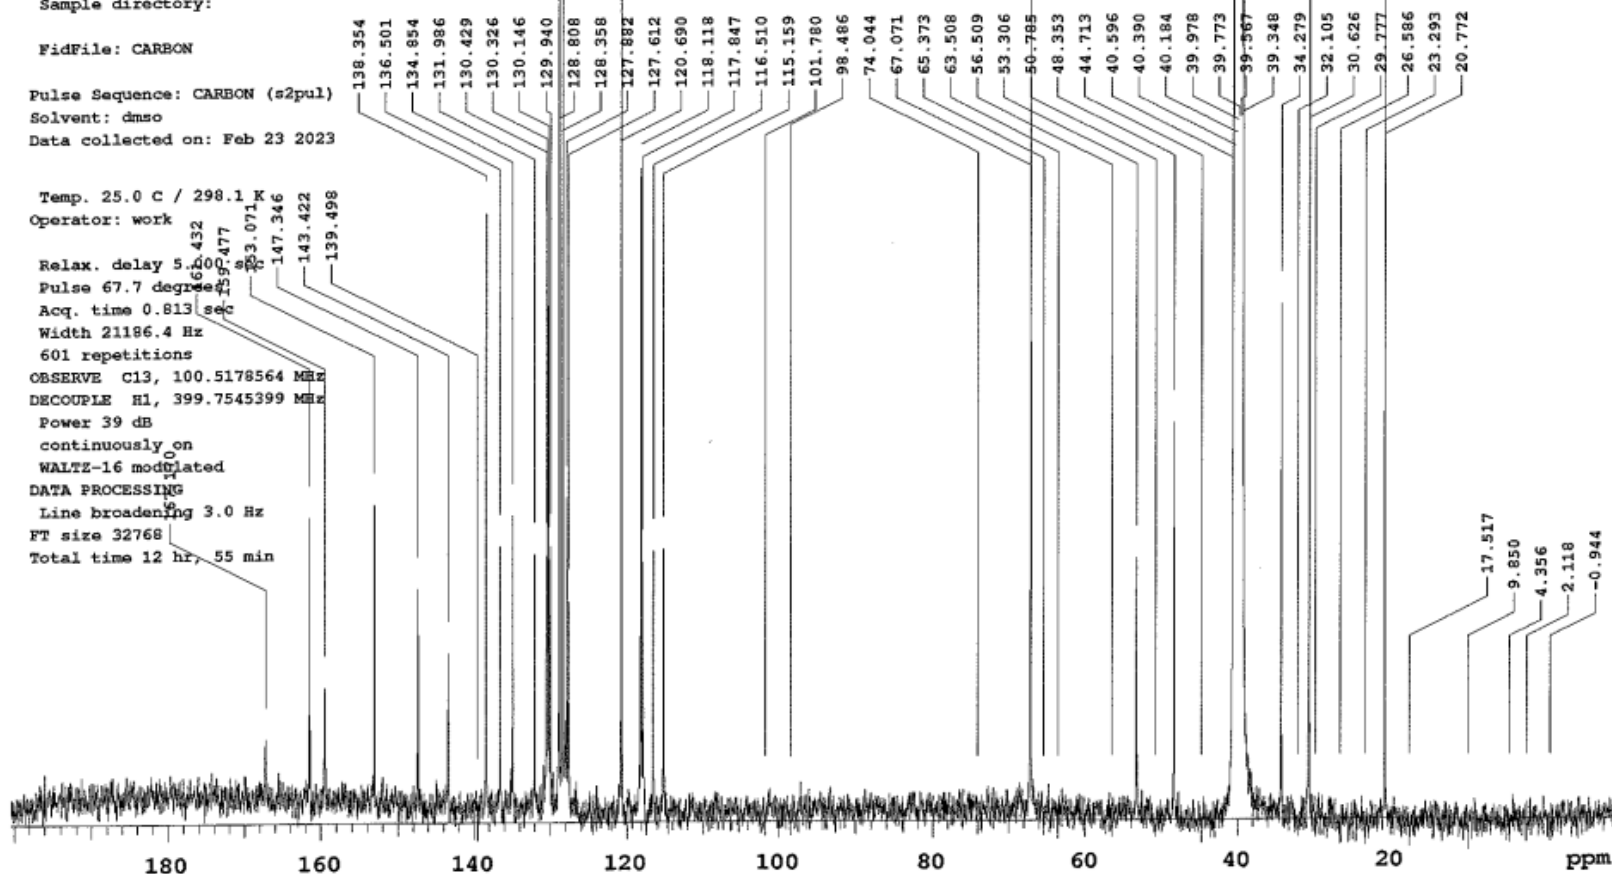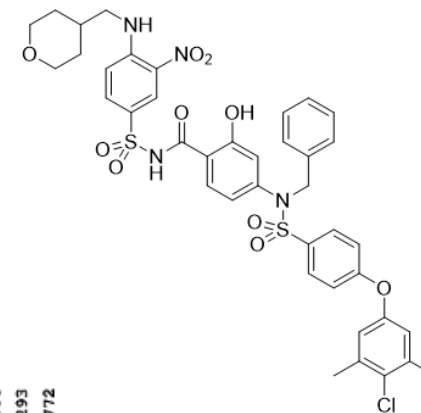

# Compound 8

LC-5-050-1H-BDL-rerun

Sample Name:

Data Collected on:

400mr-vnars400

Archive directory:

Sample directory:

FidFile: PROTON

Pulse Sequence: PROTON (s2pul)

Solvent: dmsc

Data collected on: Feb 28 2023

Temp. 25.0 C / 298.1 K

Operator: work

Relax. delay 5.000 sec

Pulse 92.6 degrees

Acq. time 1.278 sec

Width 6410.3 Hz

8 repetitions

OBSERVE H1, 399.7525412 MHz

DATA PROCESSING

Line broadening 0.5 Hz

FT size 16384

Total time 3 min 21 sec

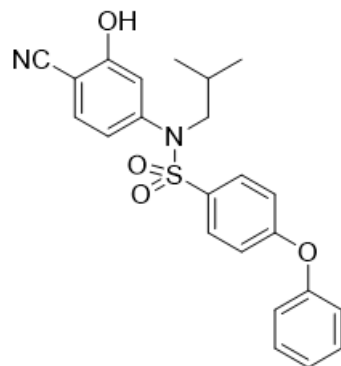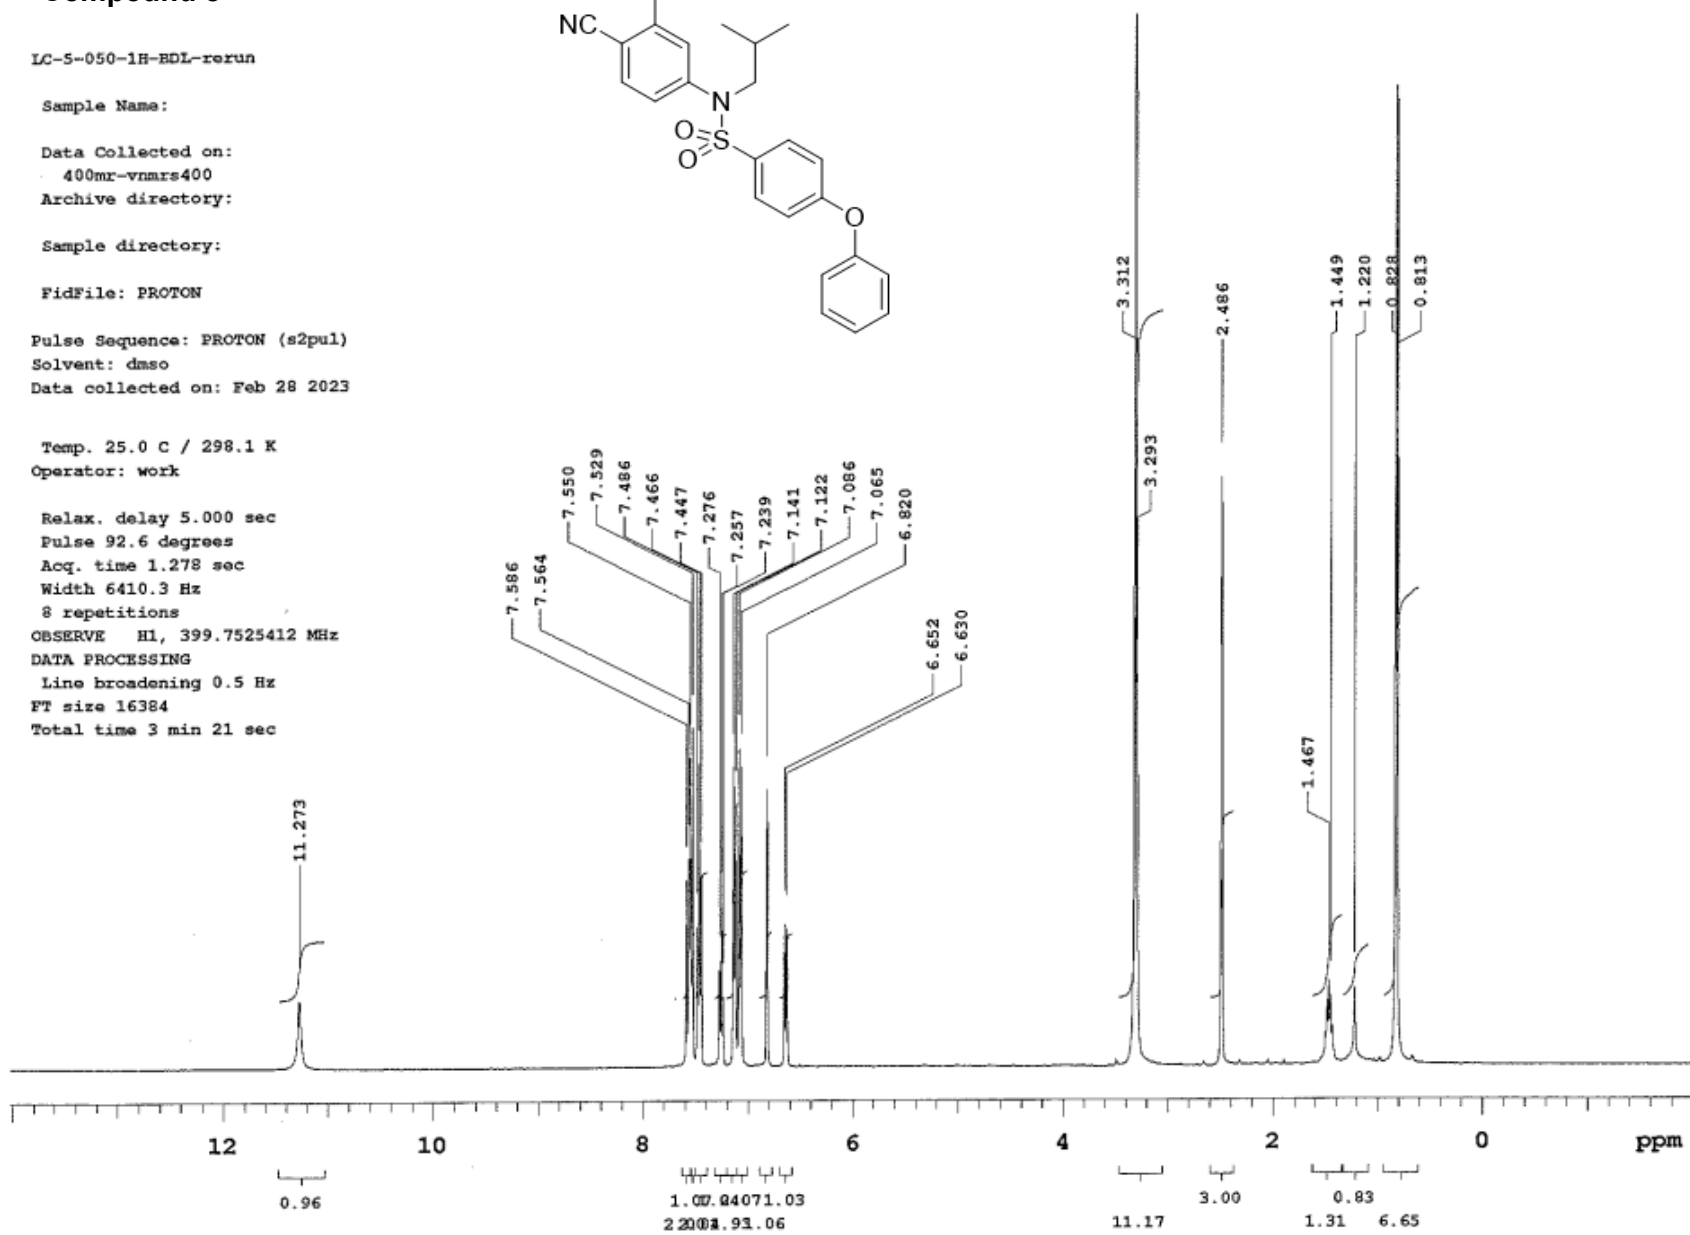

# Compound 8

LC-5-050-C13

Sample Name:

Data Collected on:

400mr-vnmrs400

Archive directory:

Sample directory:

FidFile: CARBON

Pulse Sequence: CARBON (s2pul)

Solvent: dmsc

Data collected on: Feb 21 2023

Temp. 25.0 C / 298.1 K

Operator: work

Relax. delay 5.000 sec

Pulse 67.7 degrees

Acq. time 0.813 sec

Width 21186.4 Hz

300 repetitions

OBSERVE C13, 100.5178564 MHz

DECOUPLE H1, 399.7545399 MHz

Power 39 dB

continuously on

WALTZ-16 modulated

DATA PROCESSING

Line broadening 3.0 Hz

FT size 32768

Total time 12 hr, 55 min

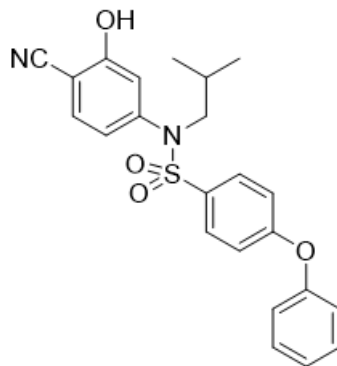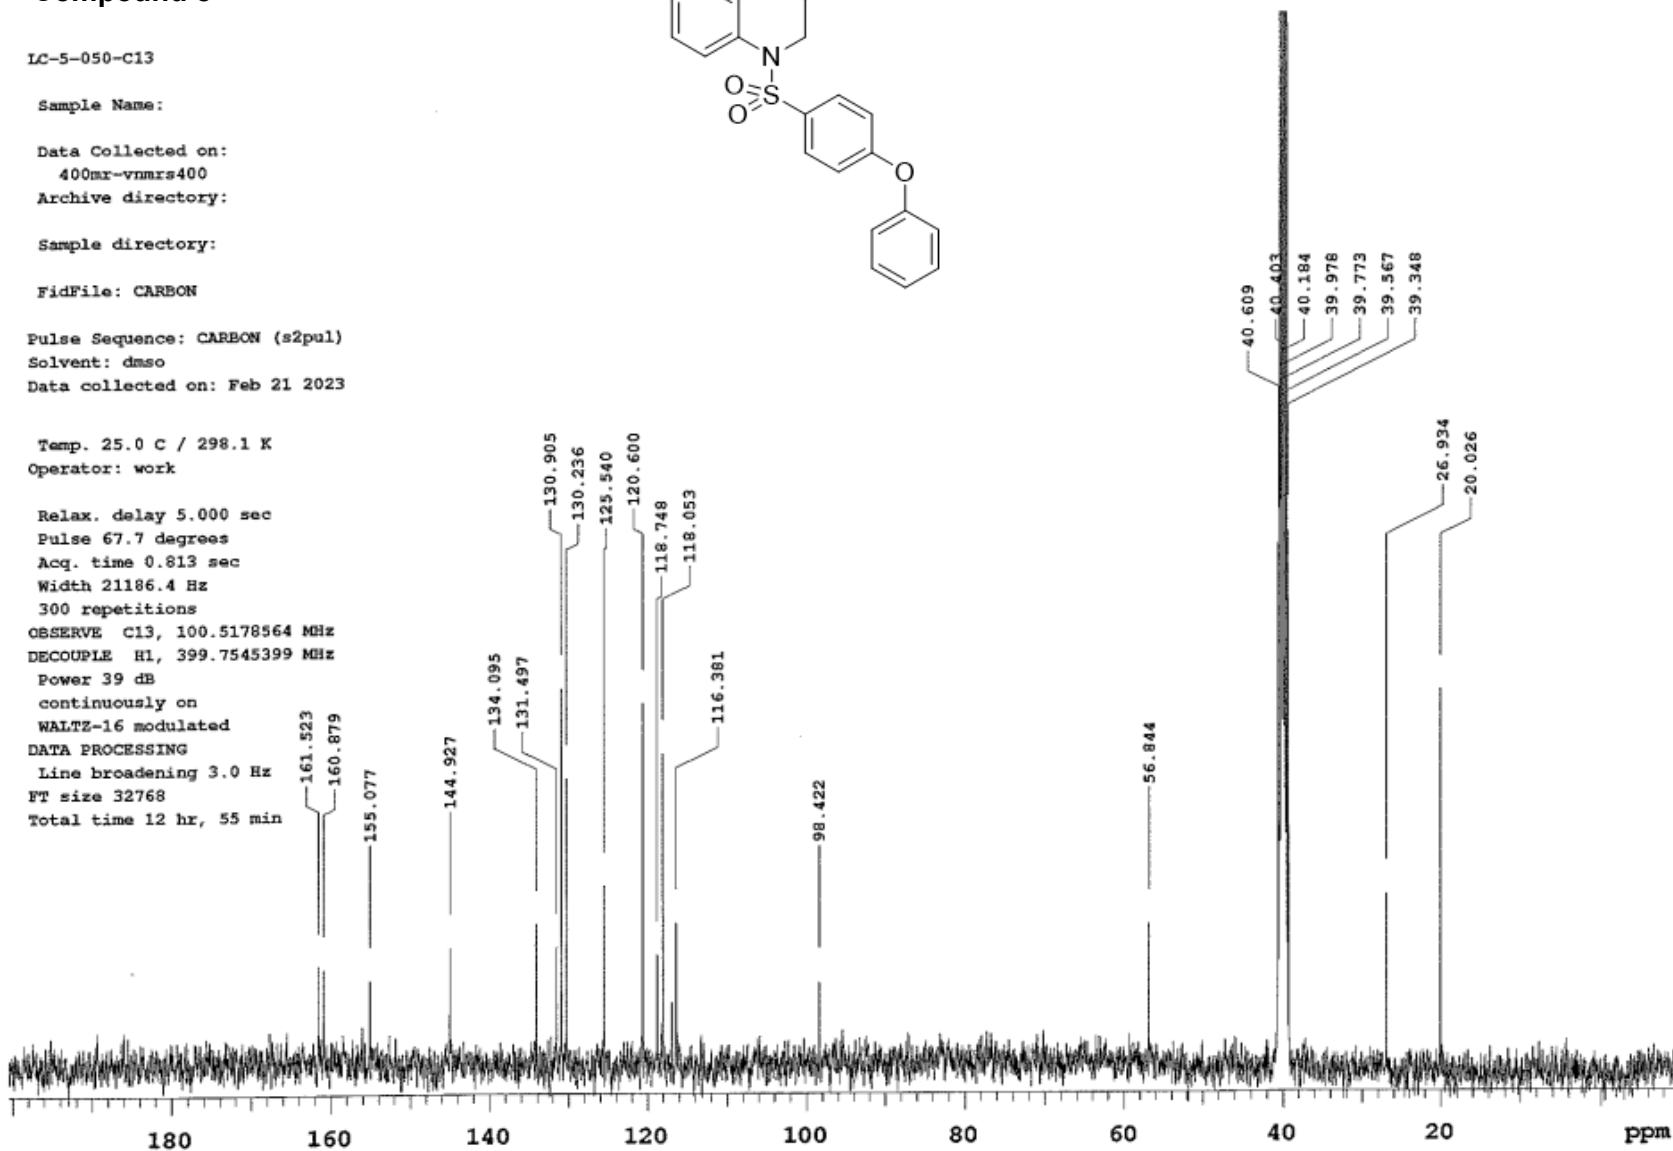

# Compound 27

BDL-2-118-1H

Sample Name:

Data Collected on:  
AgilentNMR-vnmrs500  
Archive directory:  
/home/vnmr1/vnmrsys/data/fidlib  
Sample directory:

FidFile: BDL-2-118-1H

Pulse Sequence: PROTON (s2pul)  
Solvent: dmsc  
Data collected on: Jan 6 2023

Temp. 25.0 C / 298.1 K  
Operator: biopk

Relax. delay 5.000 sec  
Pulse 93.6 degrees  
Acq. time 1.304 sec  
Width 6281.4 Hz  
8 repetitions  
OBSERVE H1, 499.7313913 MHz  
DATA PROCESSING  
Line broadening 0.5 Hz  
FT size 16384  
Total time 3 min 22 sec

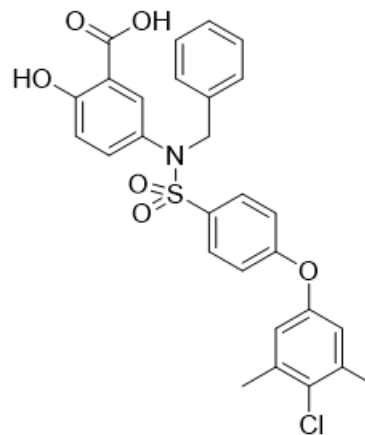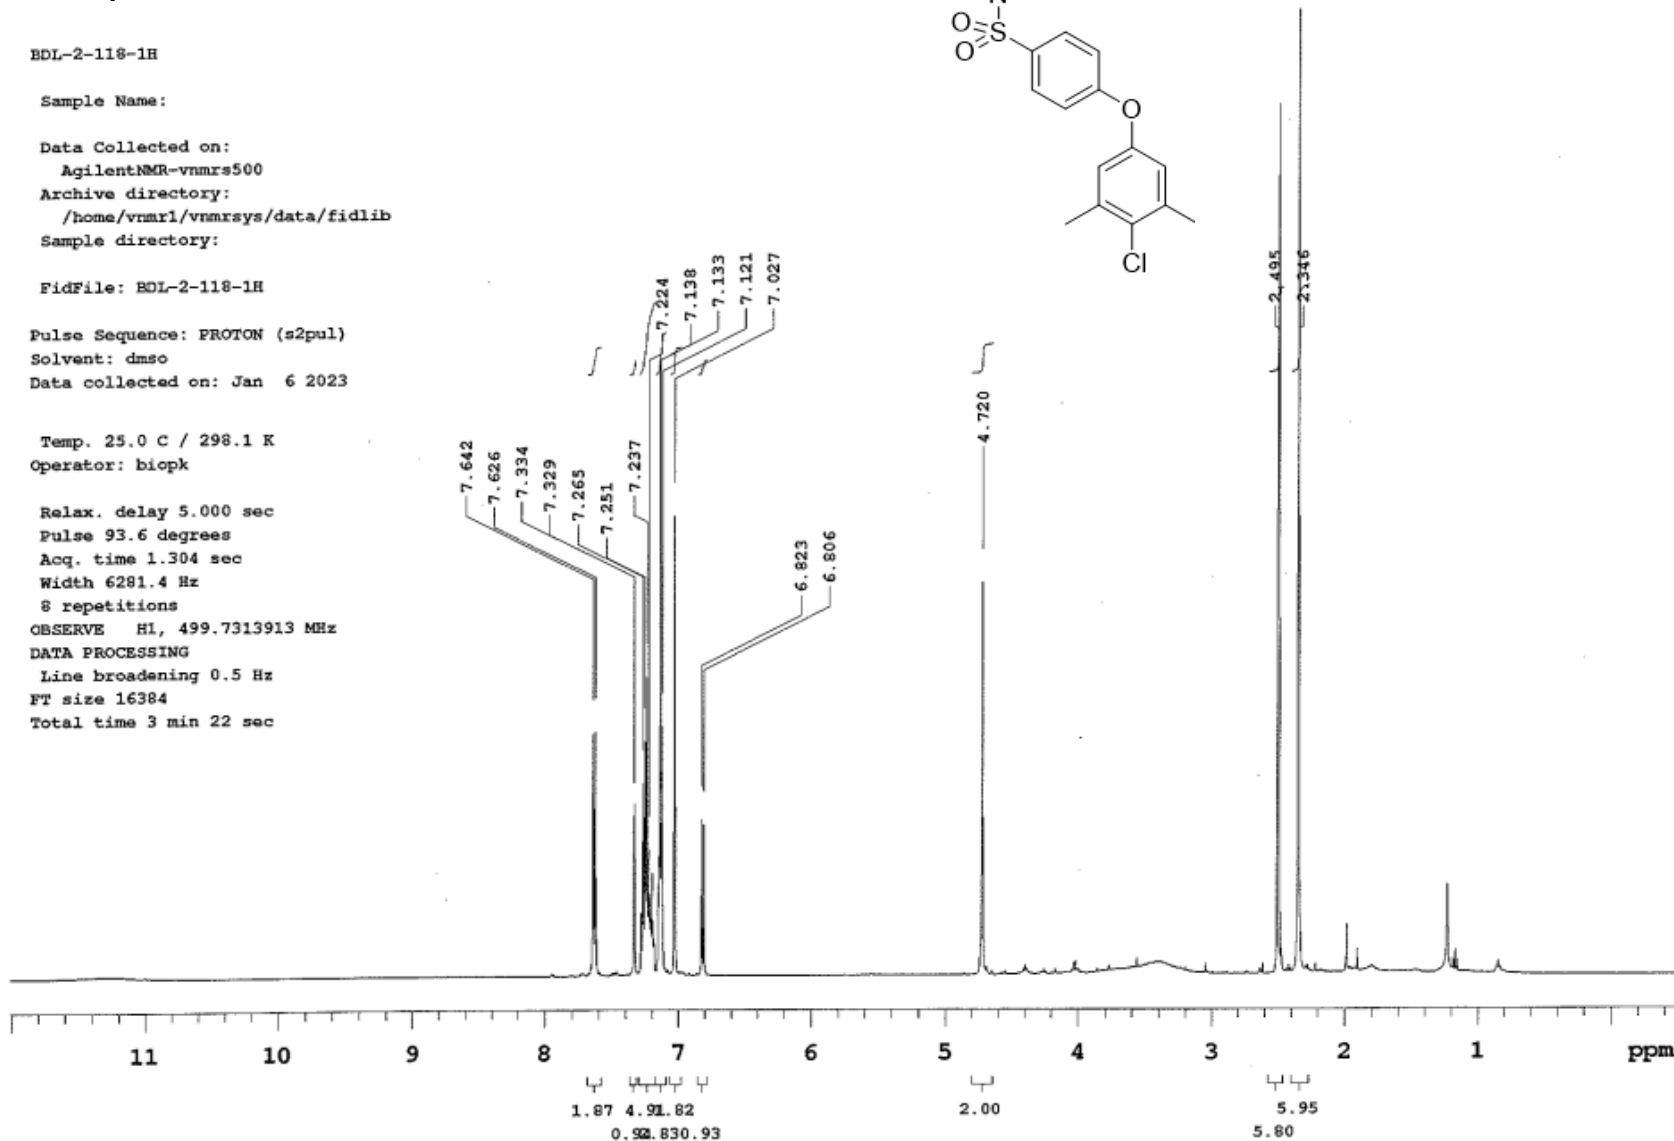

# Compound 27

LC-5-129-BDL-2-118-C13

Sample Name:

Data Collected on:

400mr-vnmrs400

Archive directory:

Sample directory:

FidFile: CARBON

Pulse Sequence: CARBON (s2pul)

Solvent: dmsc

Data collected on: Feb 23 2023

Temp. 25.0 C / 298.1 K

Operator: work

Relax. delay 5.000 sec

Pulse 67.7 degrees

Acq. time 0.813 sec

Width 21186.4 Hz

158 repetitions

OBSERVE C13, 100.5178564 MHz

DECOUPLE H1, 399.7545399 MHz

Power 39 dB

continuously on

WALTZ-16 modulated

DATA PROCESSING

Line broadening 3. Hz

FT size 32768

Total time 12 hr, 55 min

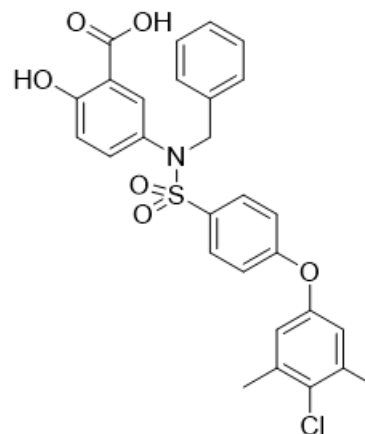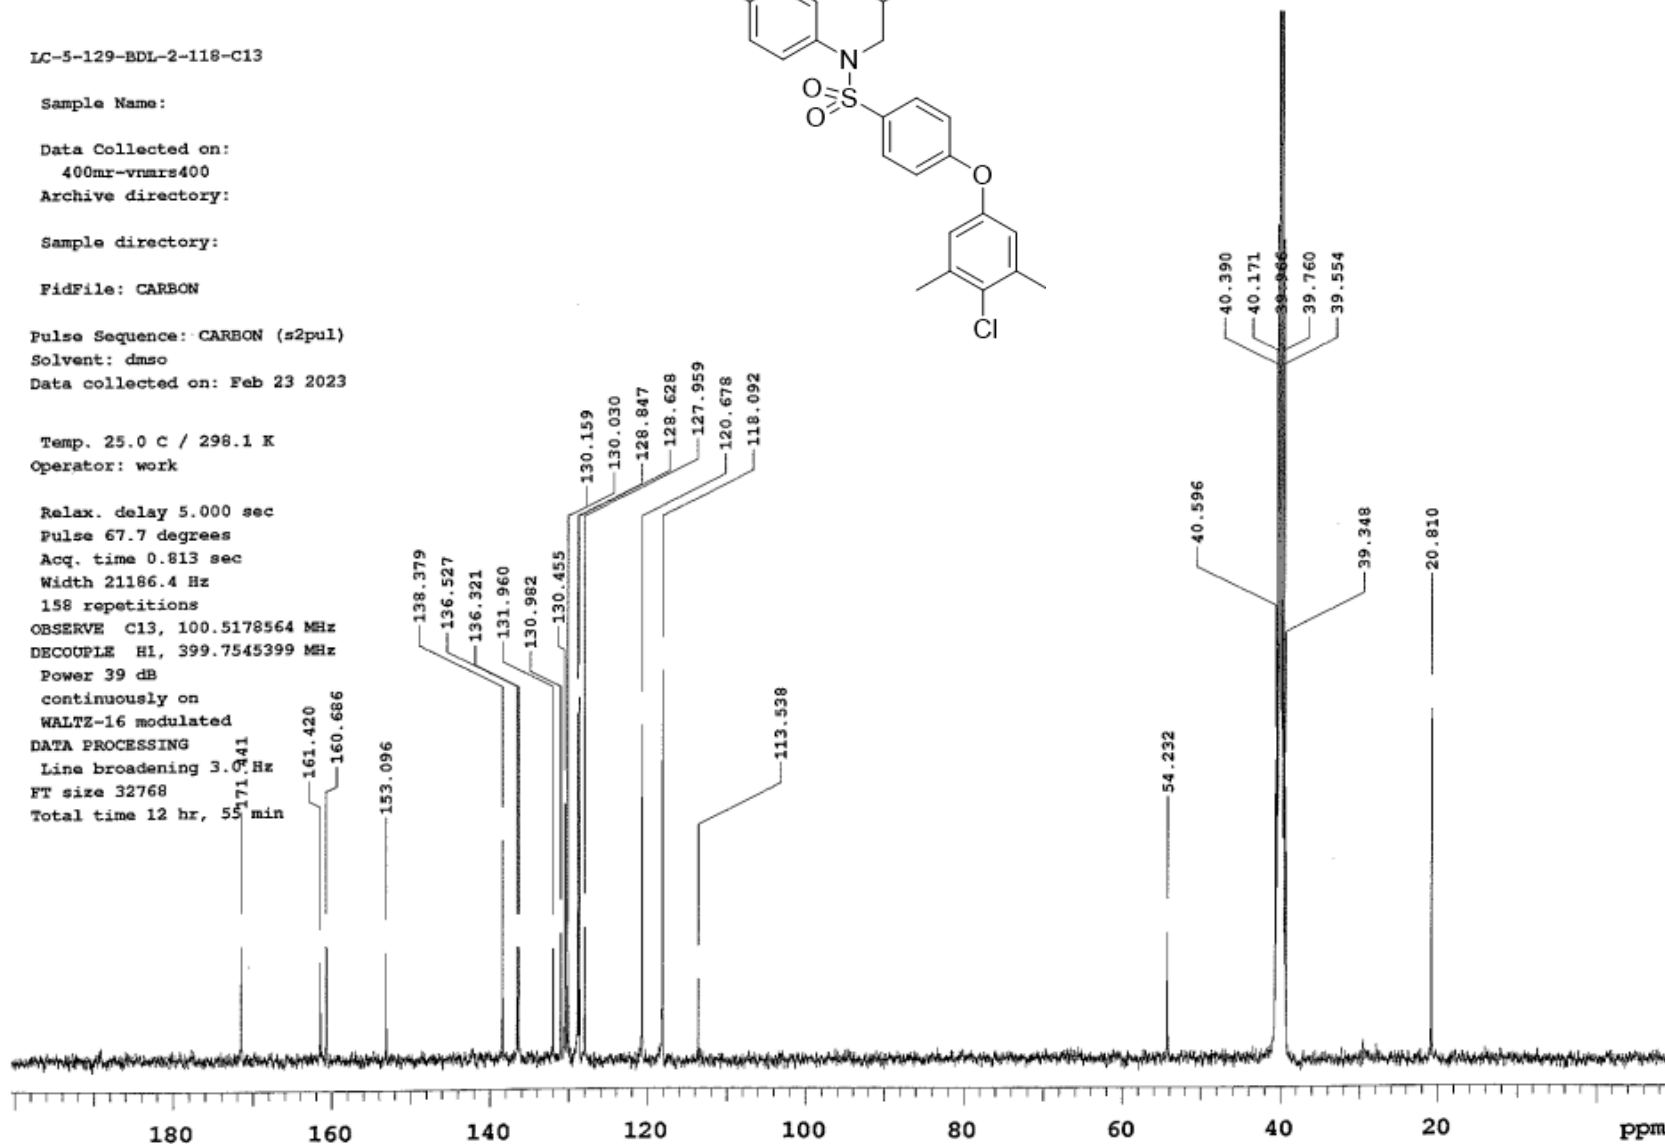

# Compound 29

LC-5-132-1H-BDL-rerun

Sample Name:

Data Collected on:

400mr-vmrs400

Archive directory:

Sample directory:

FidFile: PROTON

Pulse Sequence: PROTON (s2pul)

Solvent: dms0

Data collected on: Feb 28 2023

Temp. 25.0 C / 298.1 K

Operator: work

Relax. delay 5.000 sec

Pulse 92.6 degrees

Acq. time 1.278 sec

Width 6410.3 Hz

8 repetitions

OBSERVE H1, 399.7525412 MHz

DATA PROCESSING

Line broadening 0.5 Hz

FT size 16384

Total time 3 min 21 sec

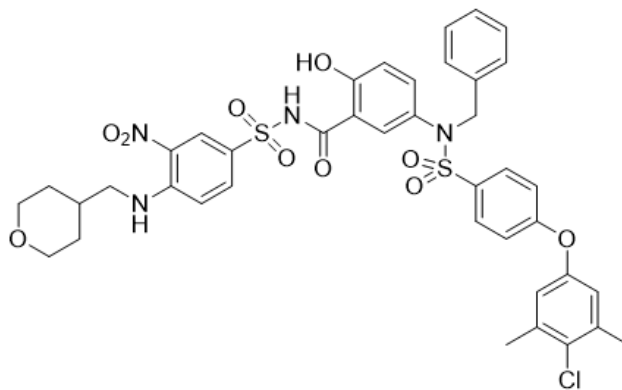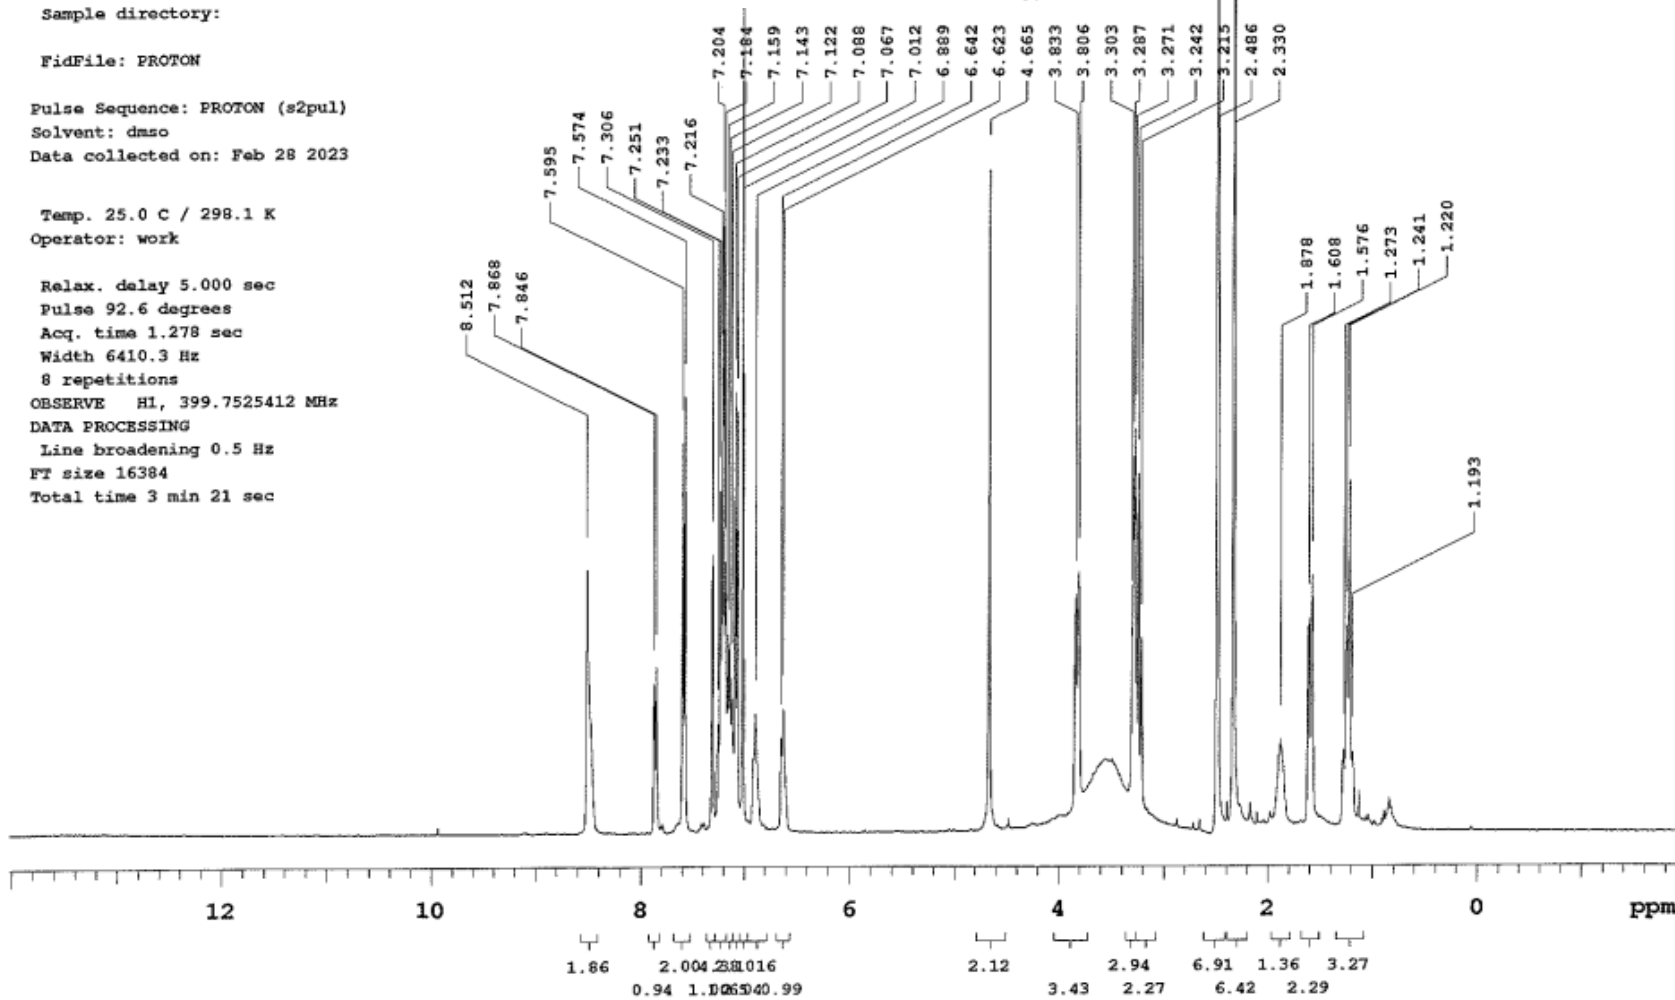

Compound 29

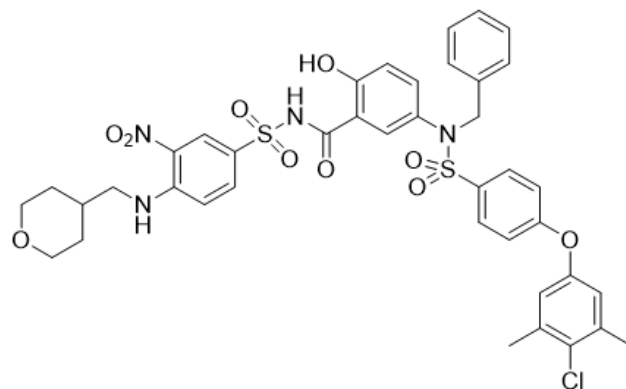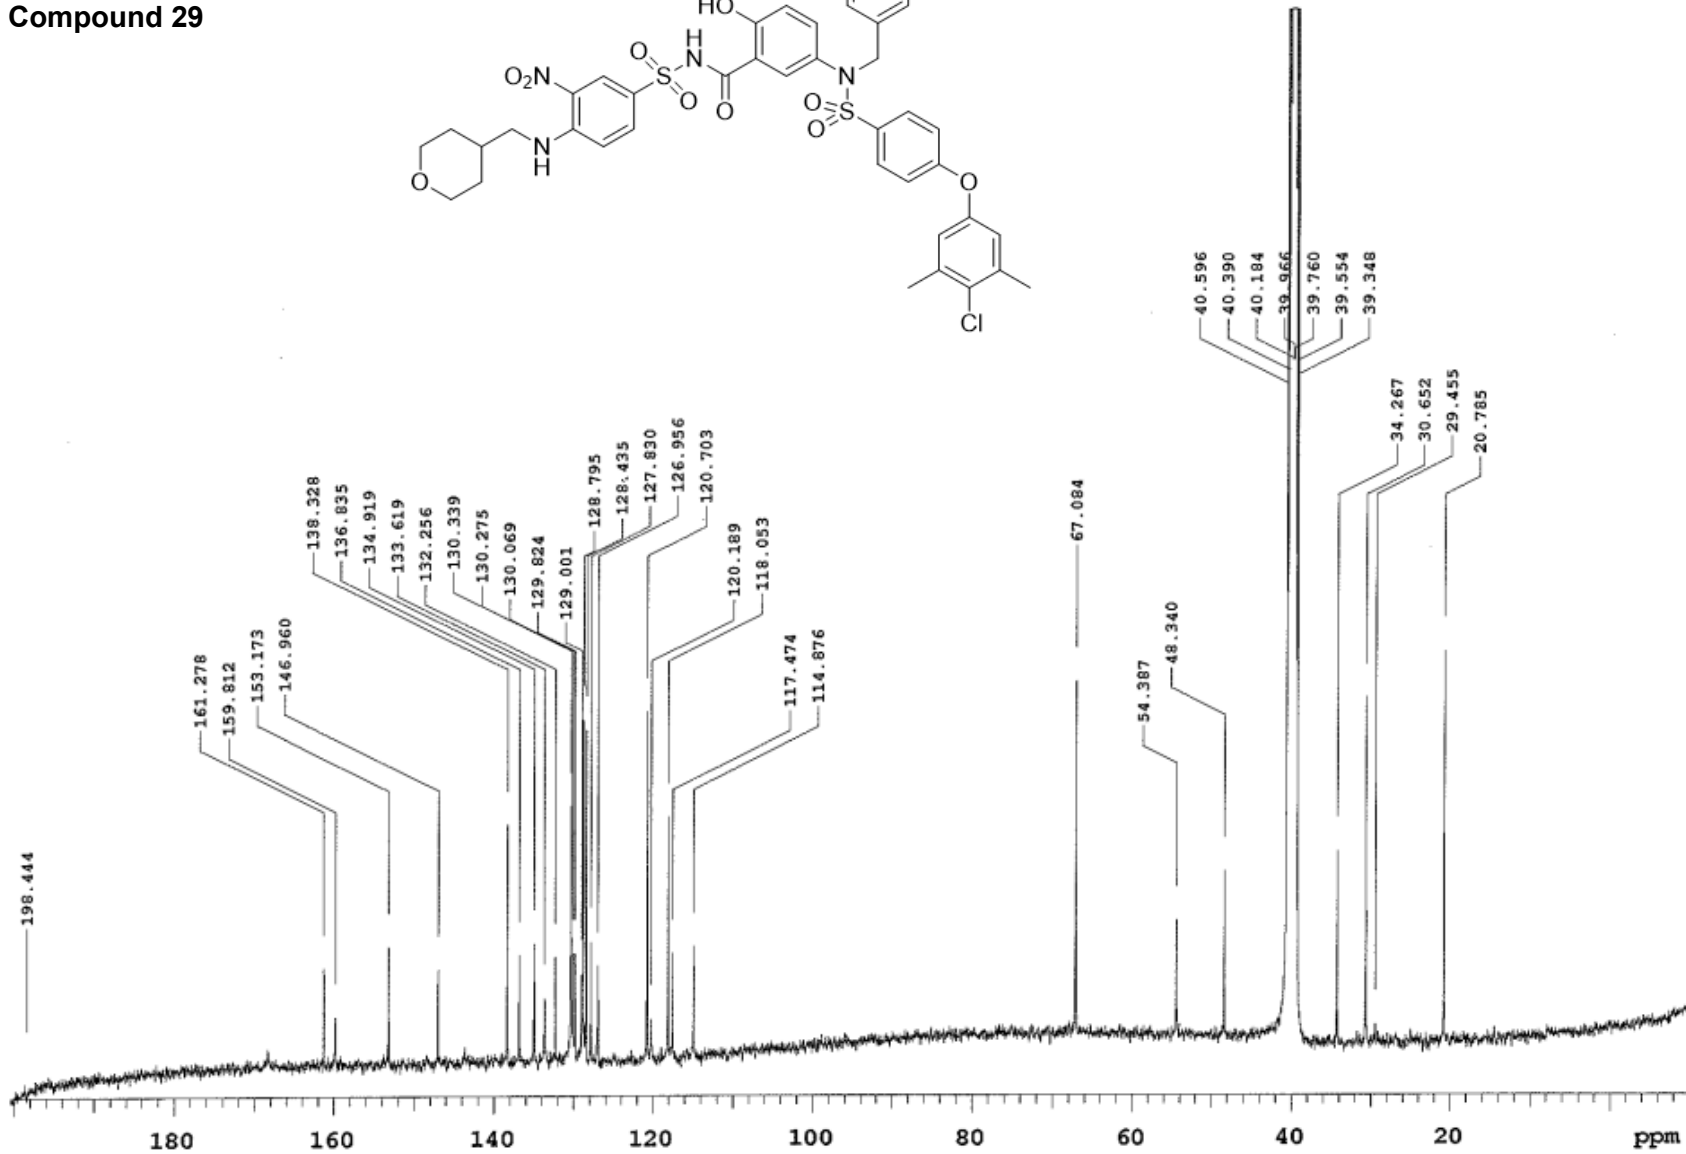

Supplement: d3ra05711a1.pdf [file d3ra05711a1.pdf]
